# Supplementary material for: [4+2+1] Domino cyclization in water for chemo- and regioselective synthesis of spiro-substituted benzo[b]furo[3,4-e][1,4]diazepine derivatives
Source: Royal Society of Chemistry journal article supplement (doi:10.1039/c1gc15183e), 2011-01-01
Supplement: c1gc15183e.pdf [file c1gc15183e.pdf]

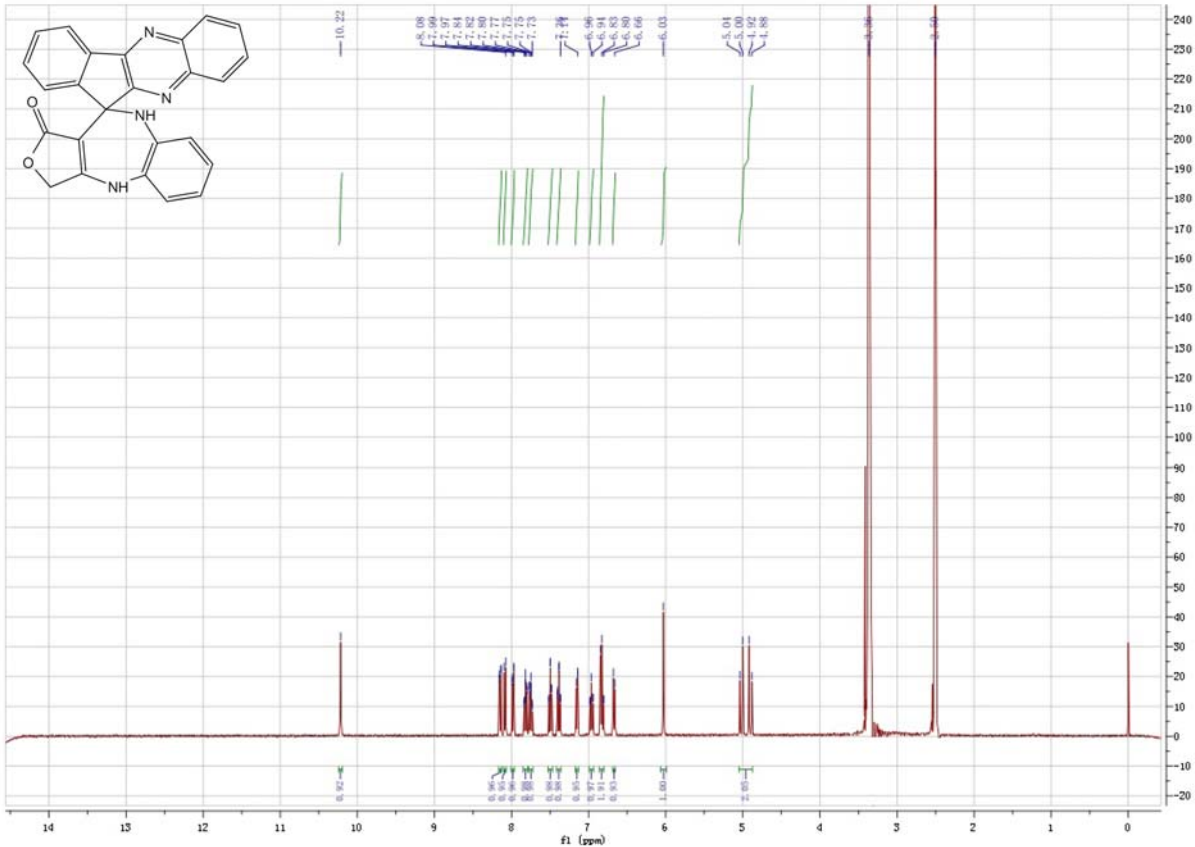

<sup>1</sup>H NMR Spectrum of Compound 4a

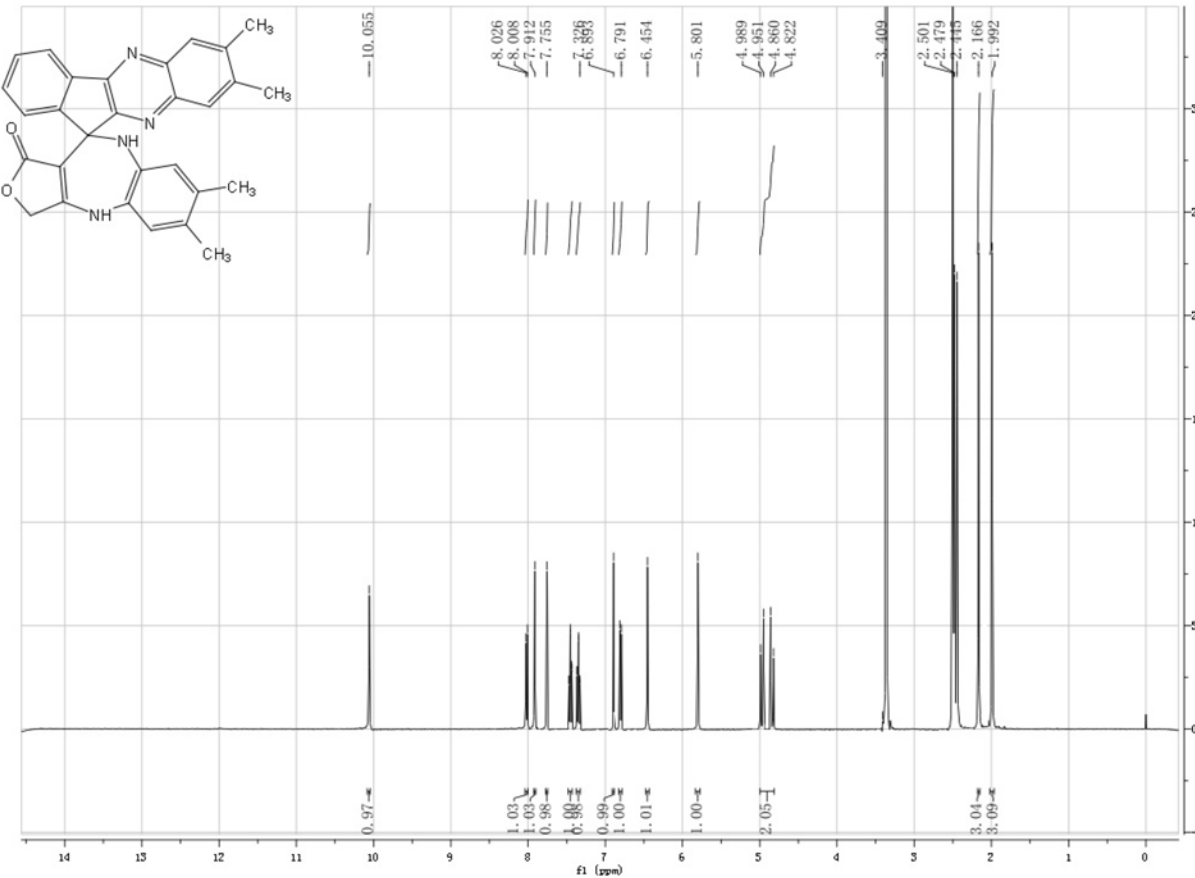

<sup>1</sup>H NMR Spectrum of Compound 4b

Chemical structure of compound 10 is shown. The <sup>1</sup>H NMR spectrum (CDCl<sub>3</sub>) displays peaks at the following chemical shifts (ppm): 10.493, 8.476, 8.335, 8.119, 8.101, 7.602, 7.599, 7.583, 7.581, 7.565, 7.562, 7.542, 7.534, 7.531, 7.515, 7.512, 7.337, 7.023, 7.005, 6.899, 6.466, 5.068, 5.029, 4.968, 4.929, 3.962, and 2.504. Integration values are provided below the baseline: 0.85, 0.88, 0.96, 0.93, 1.94, 0.96, 0.95, 0.97, 2.00, and 0.85.

### <sup>1</sup>H NMR Spectrum of Compound 4c

Chemical structure of the compound is shown above the spectrum. The spectrum displays peaks corresponding to the following chemical shifts (ppm):

| Chemical Shift (ppm) |
|----------------------|
| 171.152              |
| 162.982              |
| 159.089              |
| 154.842              |
| 150.168              |
| 138.755              |
| 137.955              |
| 137.328              |
| 136.511              |
| 134.034              |
| 133.168              |
| 132.879              |
| 132.014              |
| 130.199              |
| 129.216              |
| 129.176              |
| 128.112              |
| 128.215              |
| 127.400              |
| 126.841              |
| 126.696              |
| 125.901              |
| 126.380              |
| 125.889              |
| 124.608              |
| 124.368              |
| 122.184              |
| 119.038              |
| 115.541              |
| 98.215               |
| 66.820               |
| 64.717               |

### <sup>13</sup>C NMR Spectrum of Compound 4d

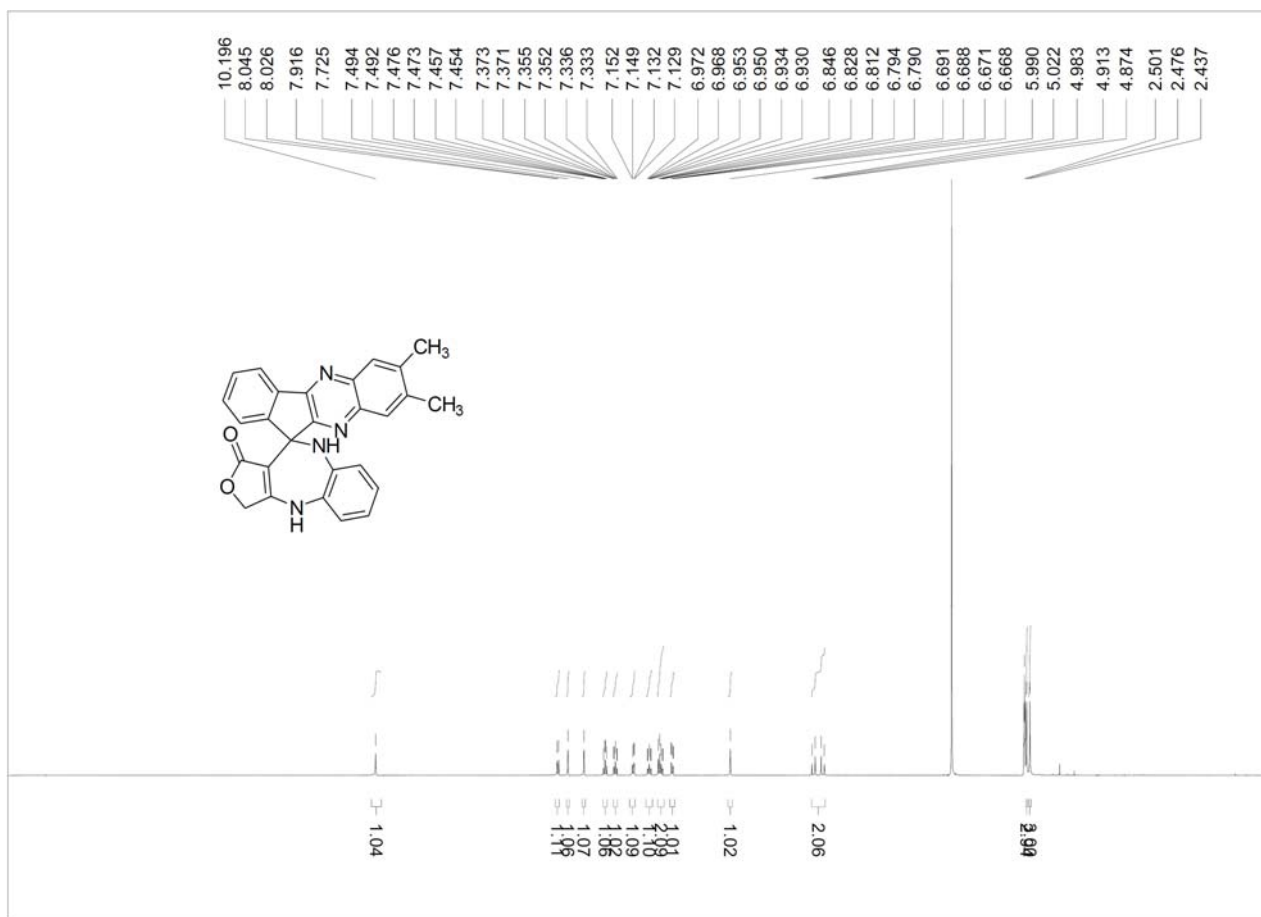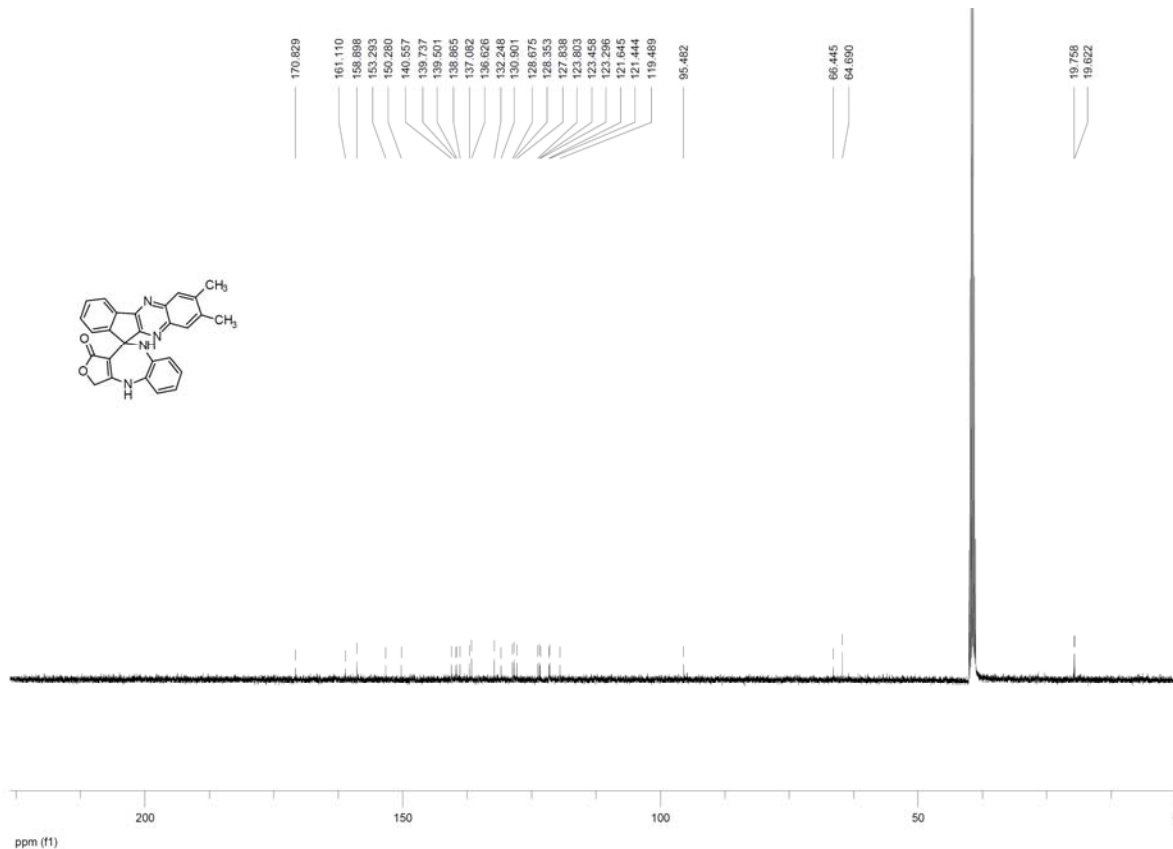

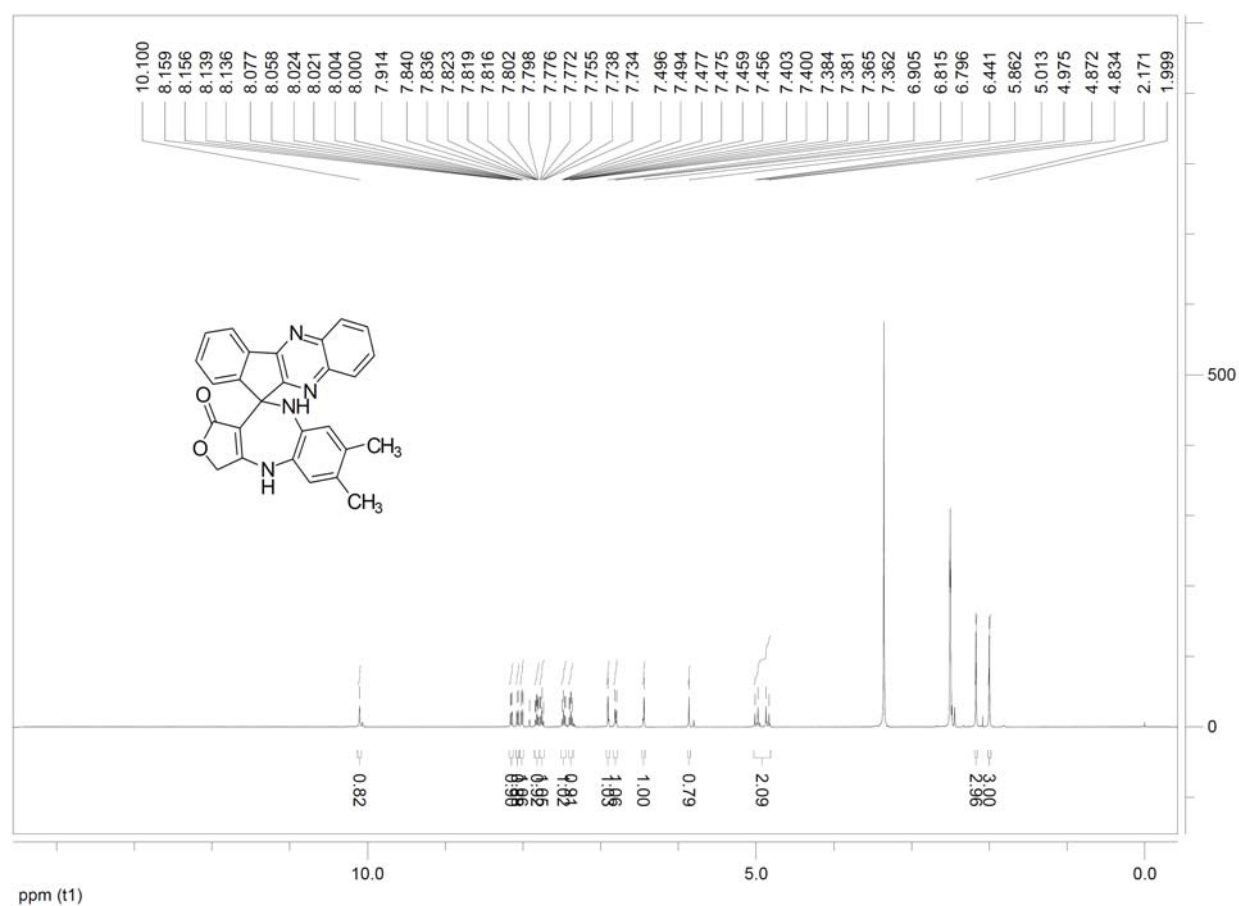

<sup>1</sup>H NMR Spectrum of Compound 4f

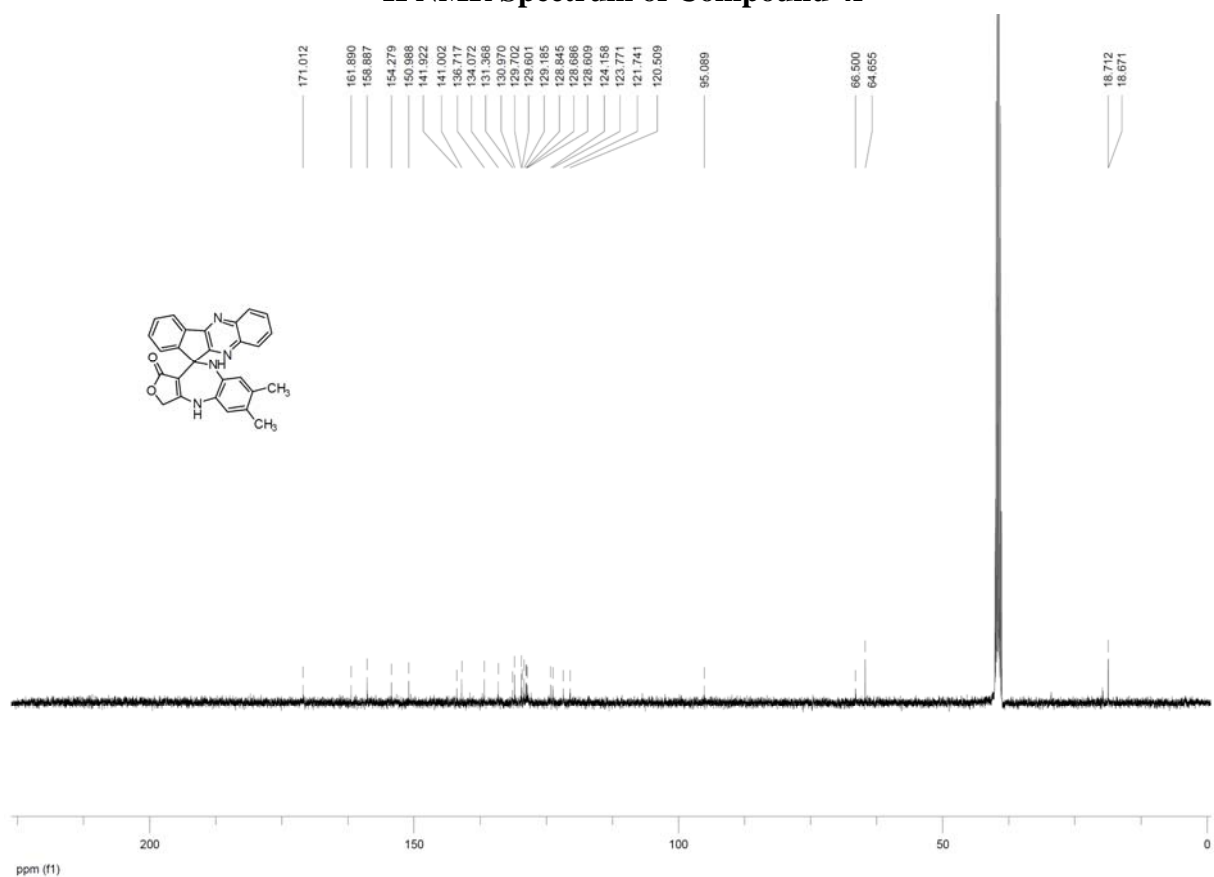

<sup>13</sup>C NMR Spectrum of Compound 4f

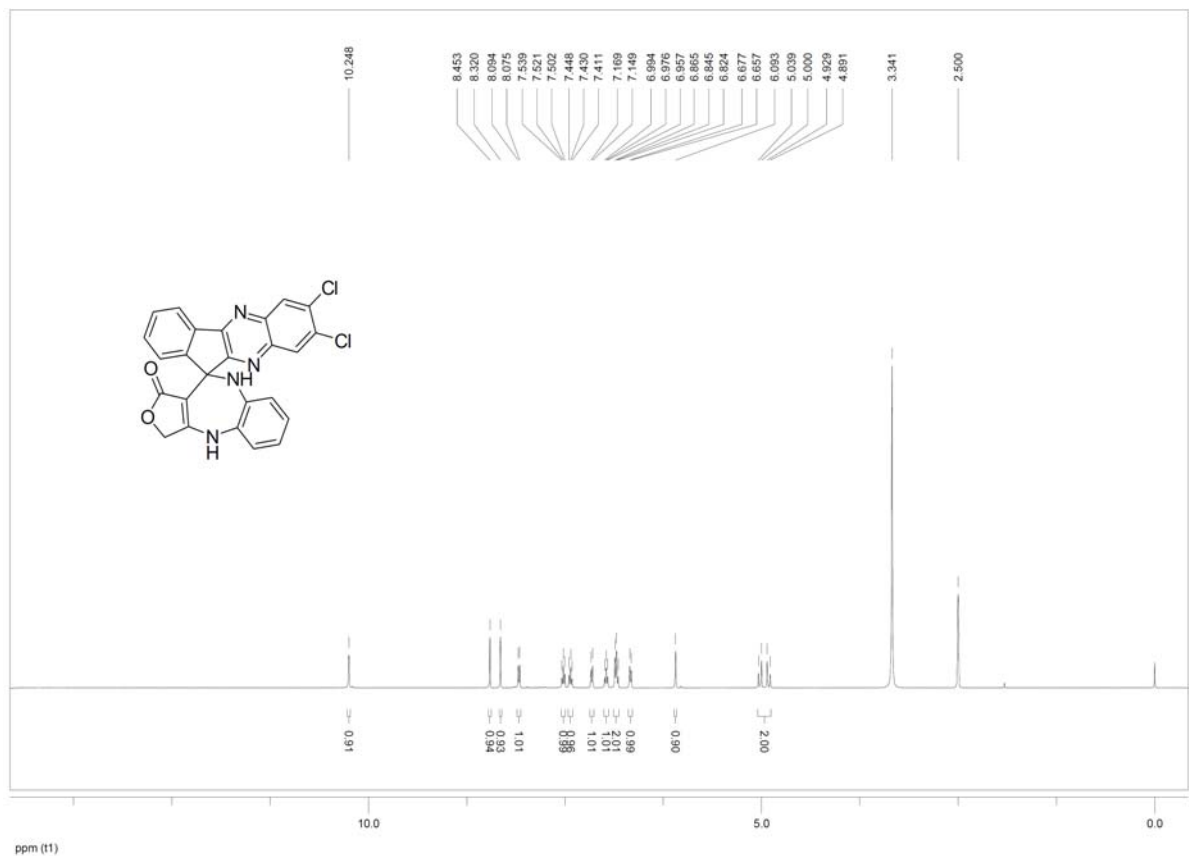

**<sup>1</sup>H NMR Spectrum of Compound 4g**

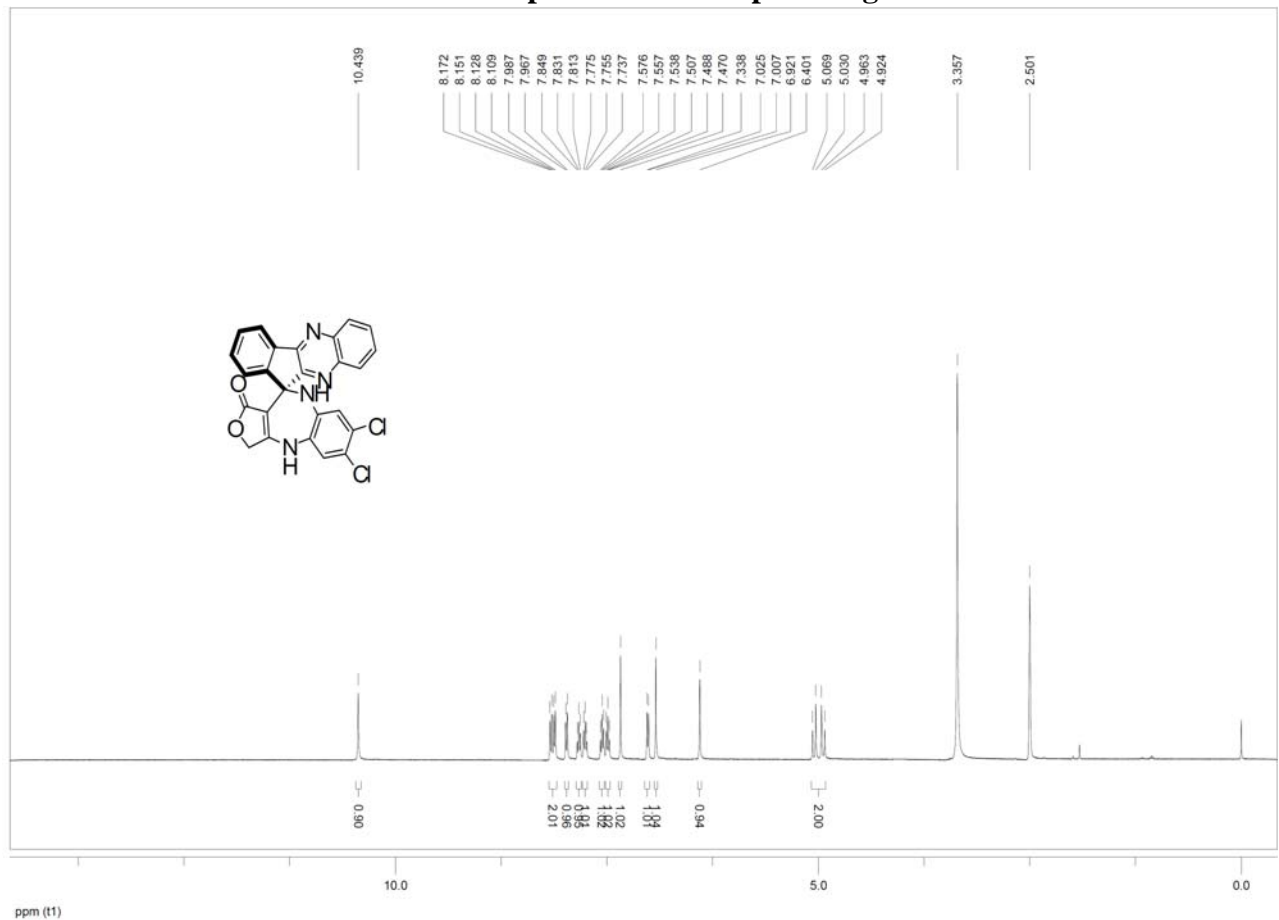

**<sup>1</sup>H NMR Spectrum of Compound 4h**

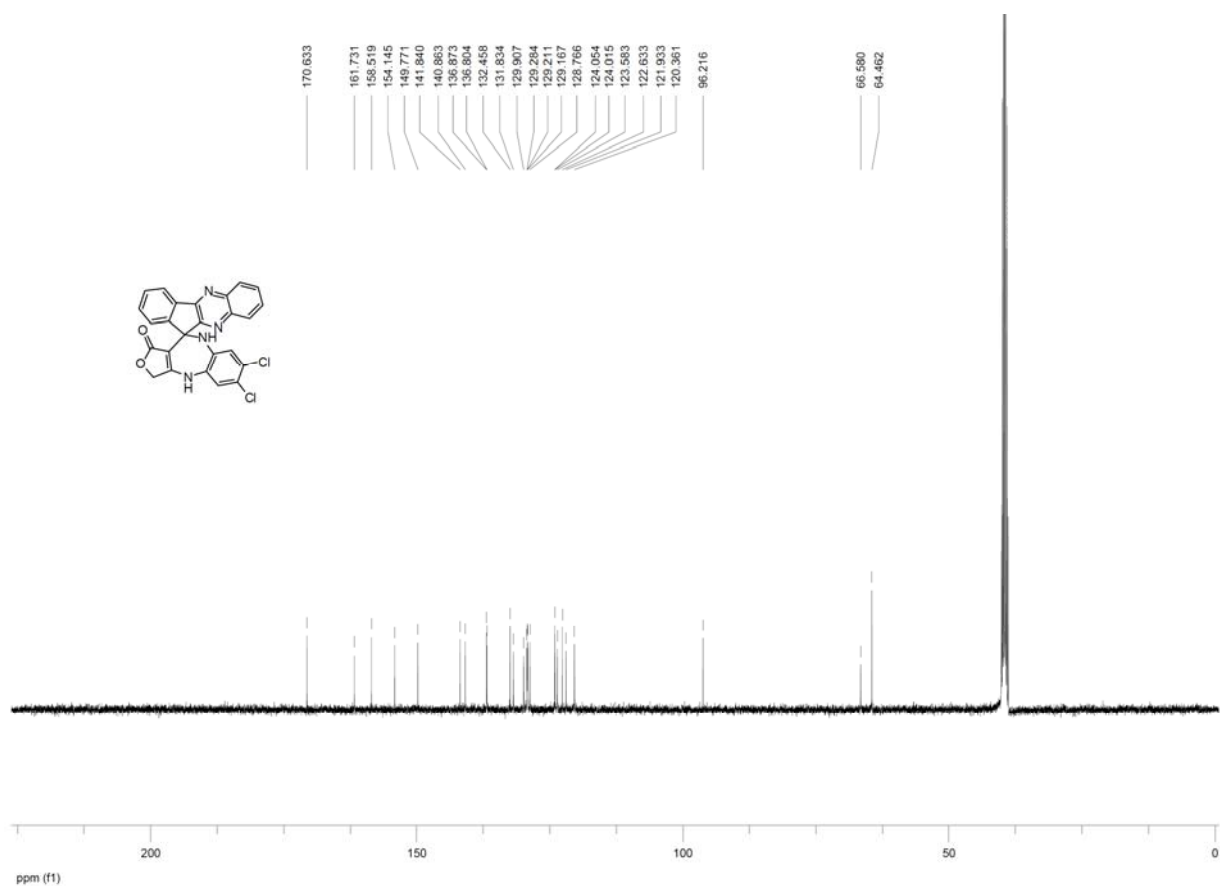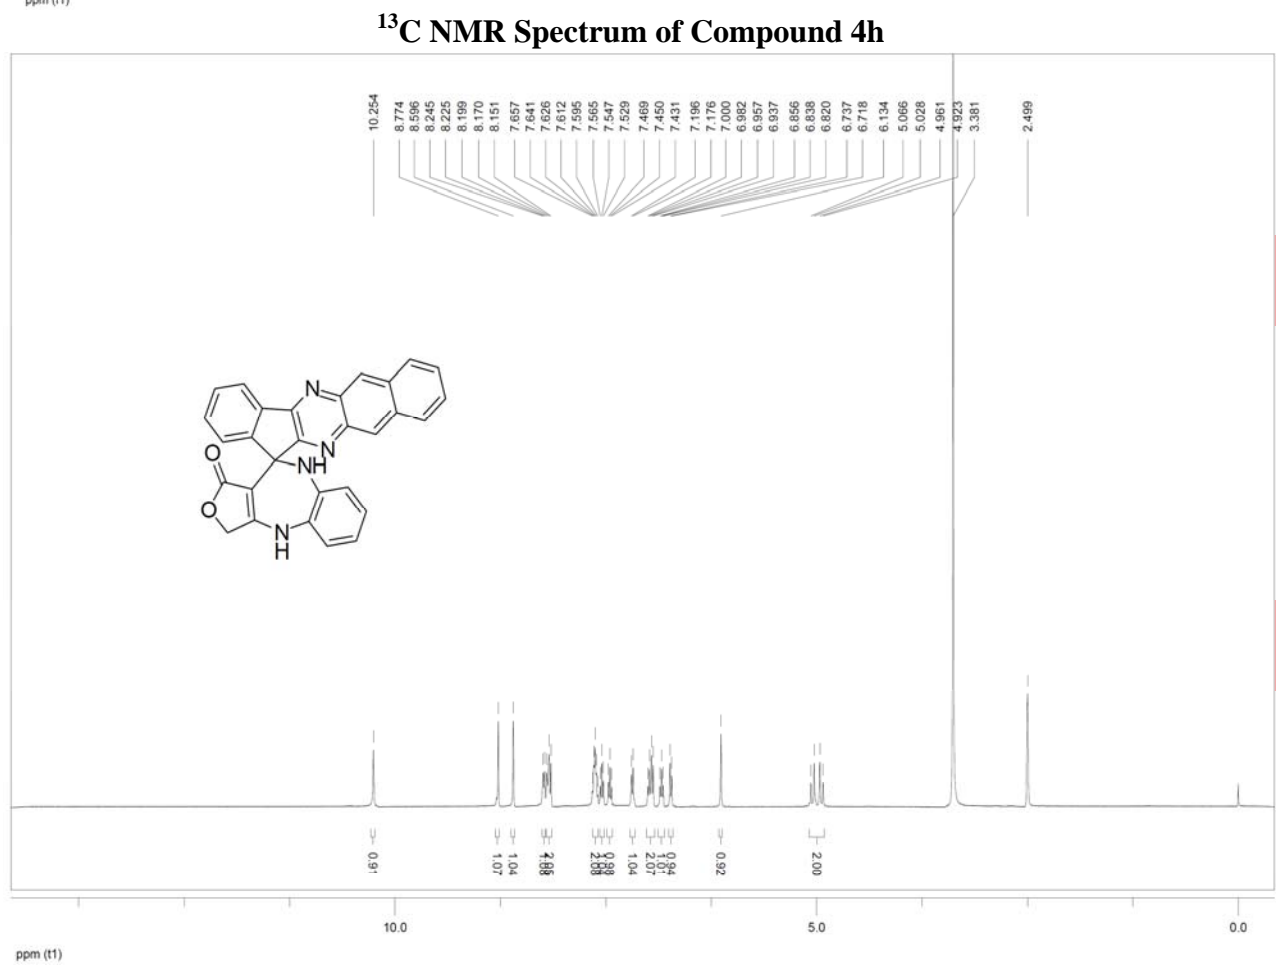

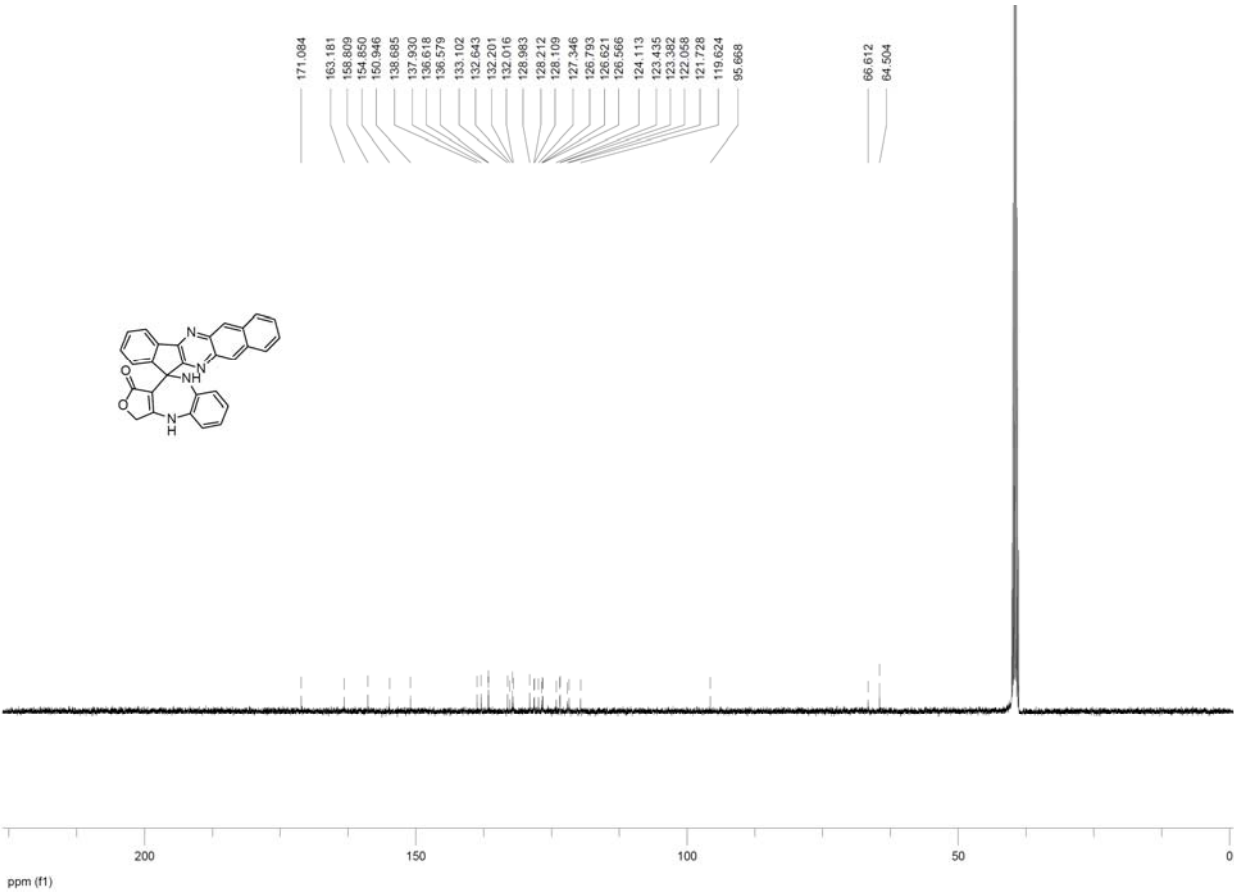

**<sup>13</sup>C NMR Spectrum of Compound 4i**

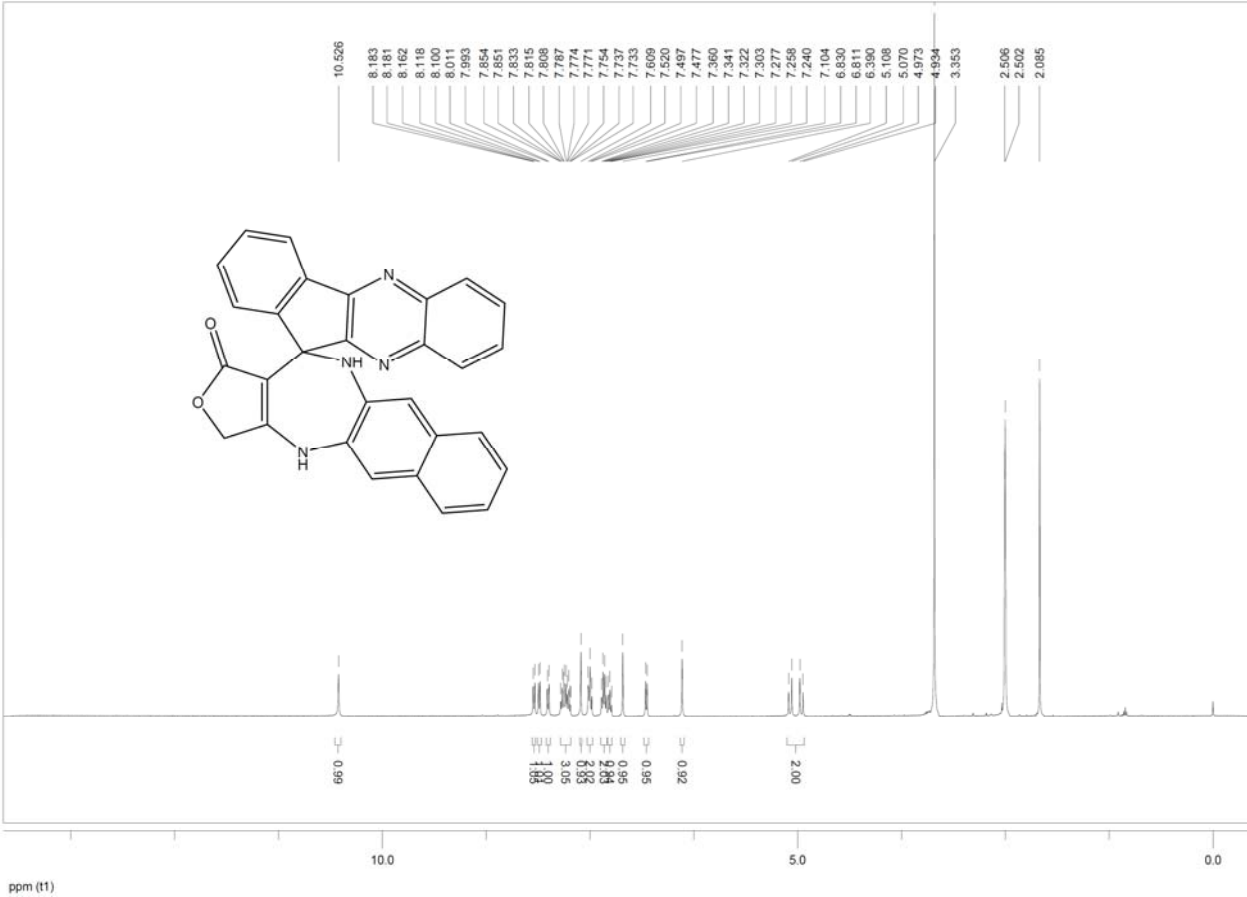

**<sup>1</sup>H NMR Spectrum of Compound 4j**



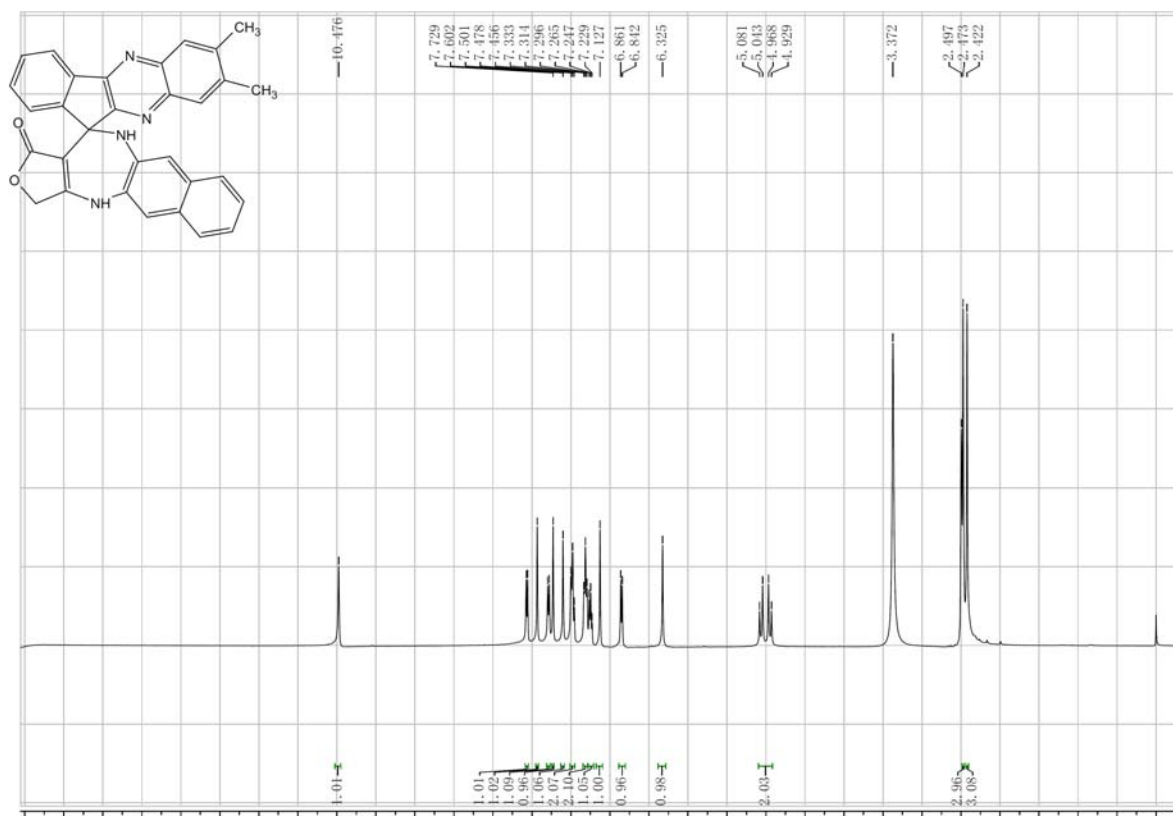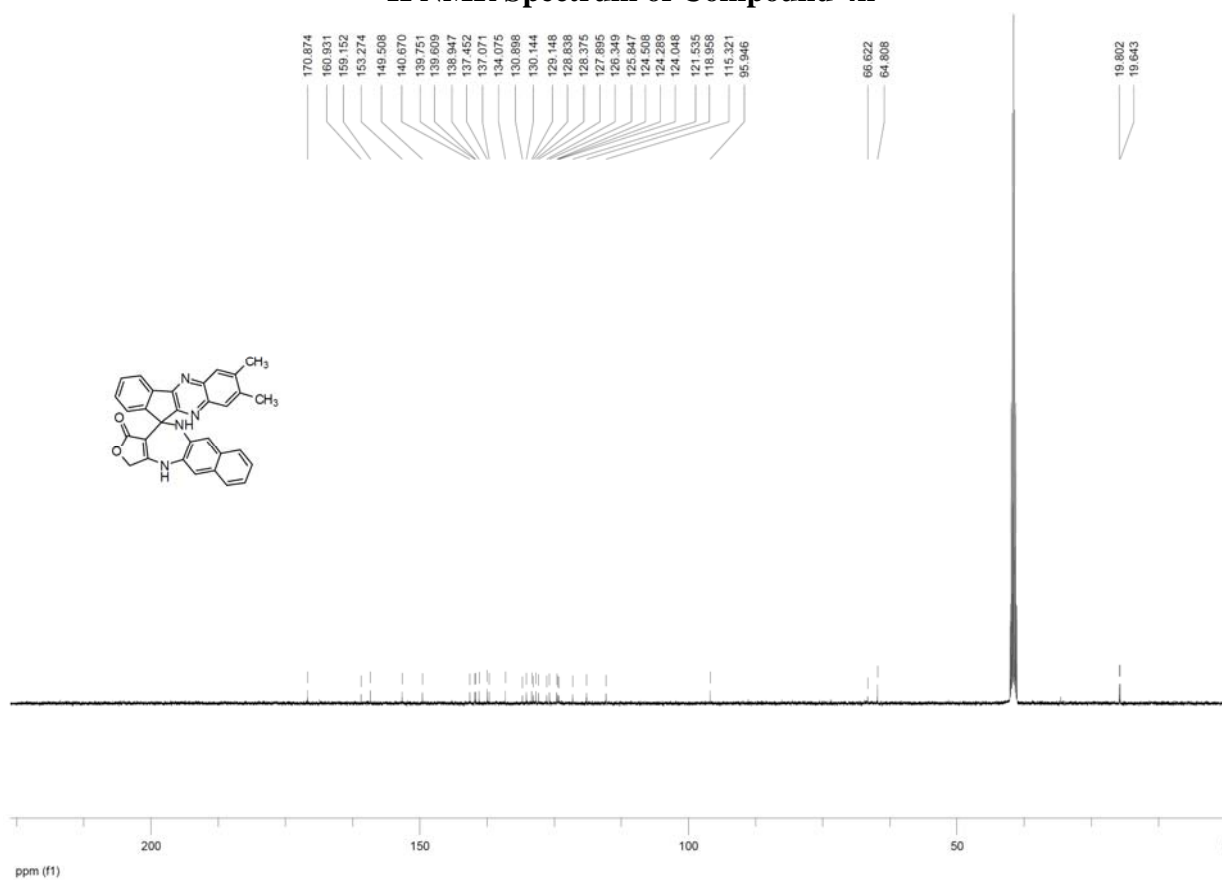

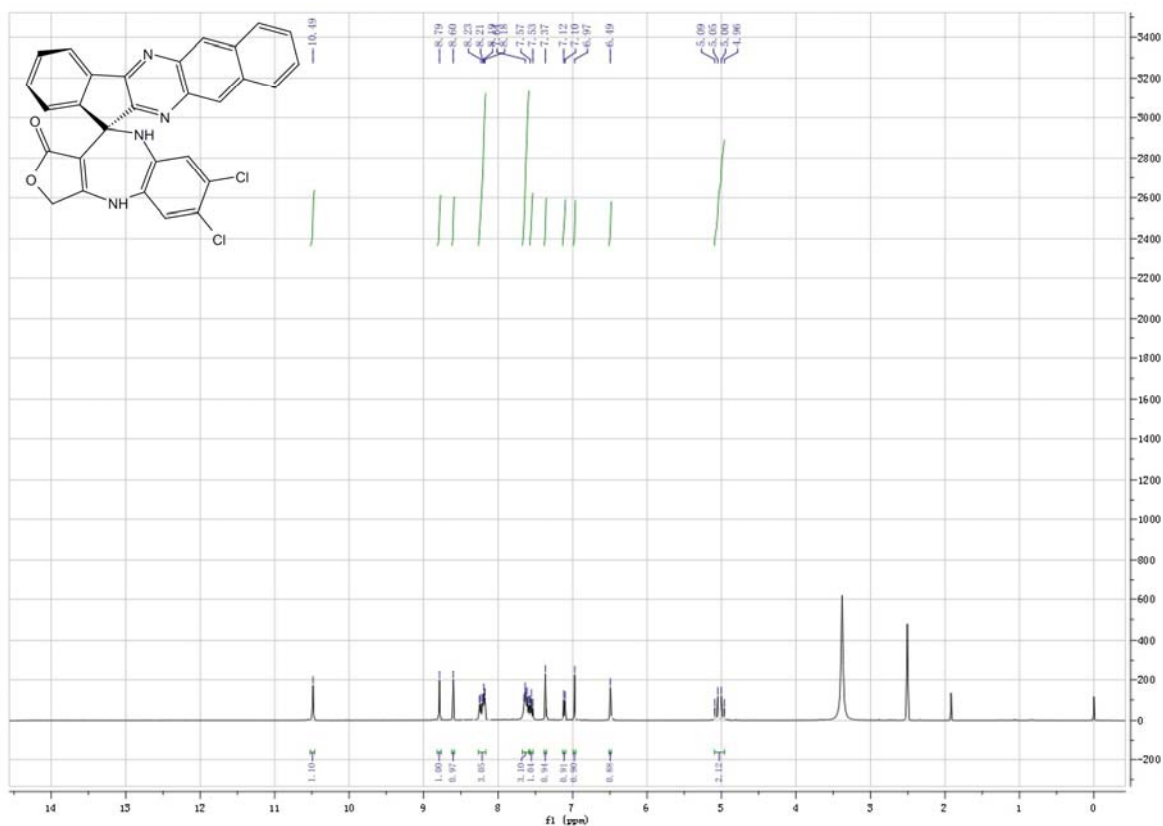

<sup>1</sup>H NMR Spectrum of Compound 4l

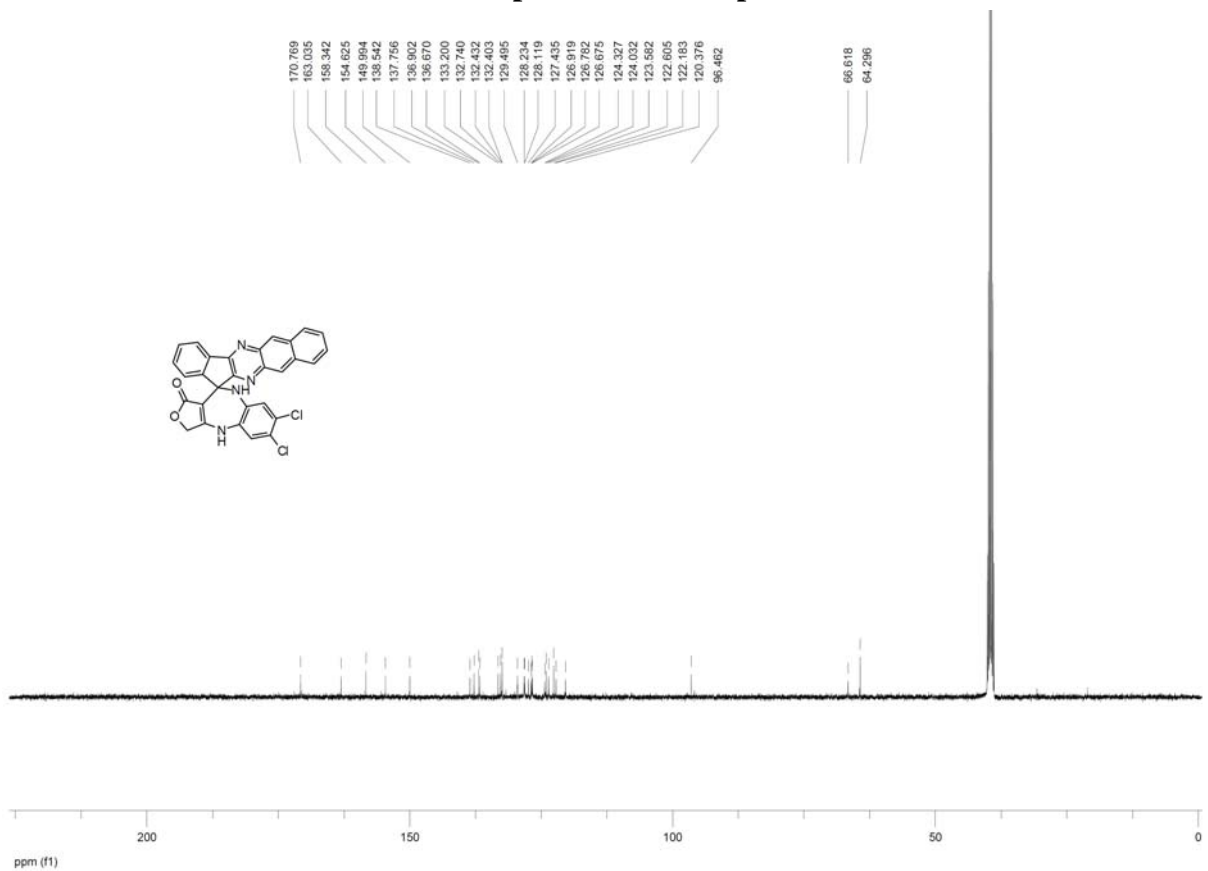

<sup>13</sup>C NMR Spectrum of Compound 4l

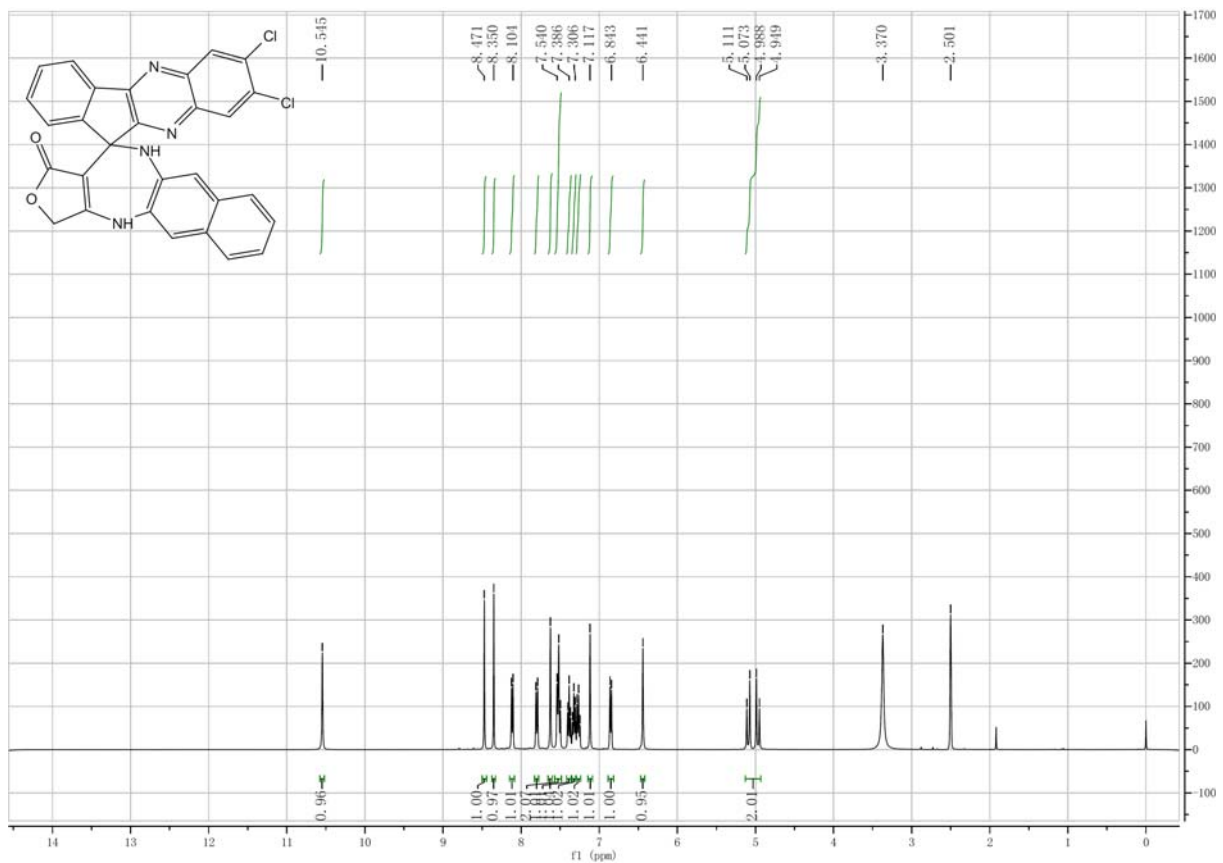

**<sup>1</sup>H NMR Spectrum of Compound 4m**

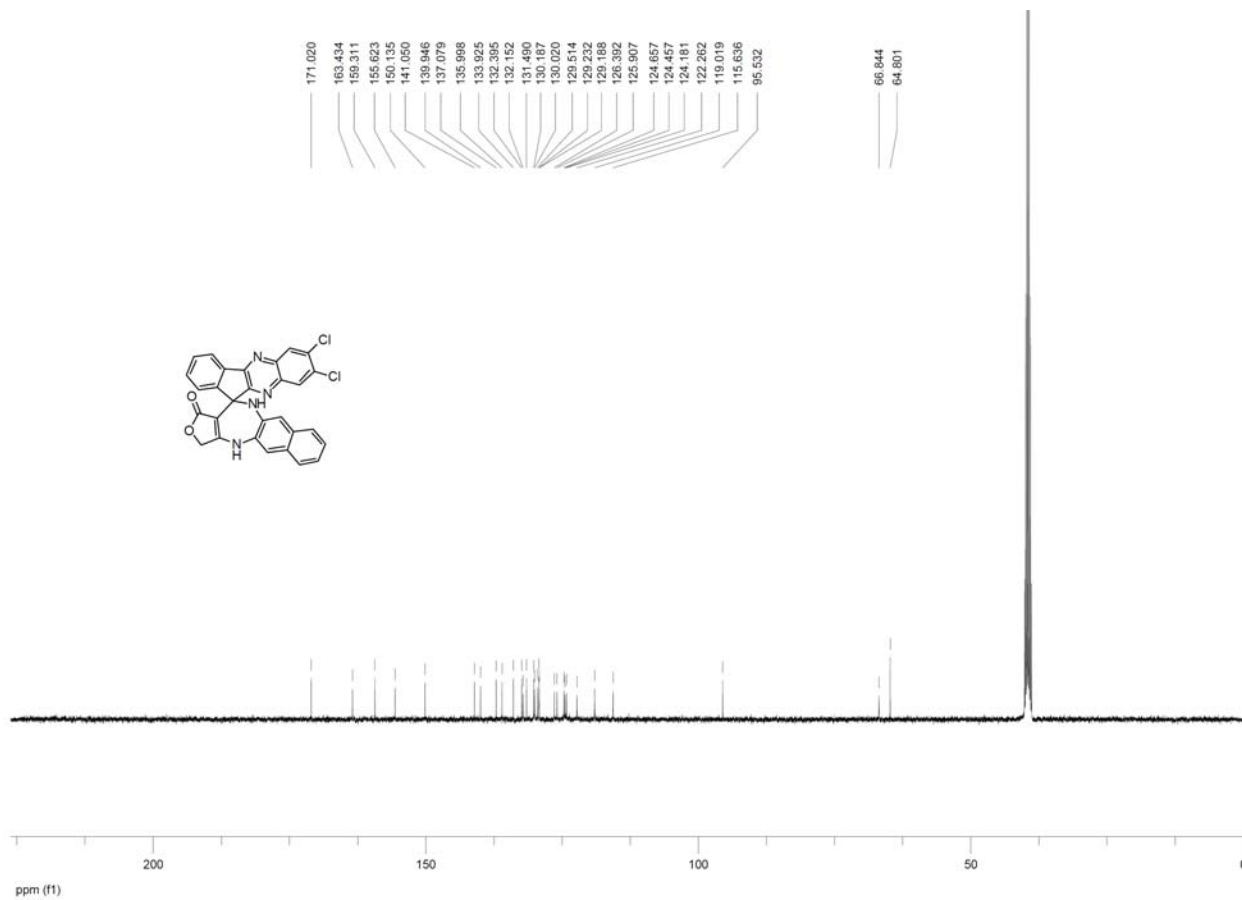

**<sup>13</sup>C NMR Spectrum of Compound 4m**

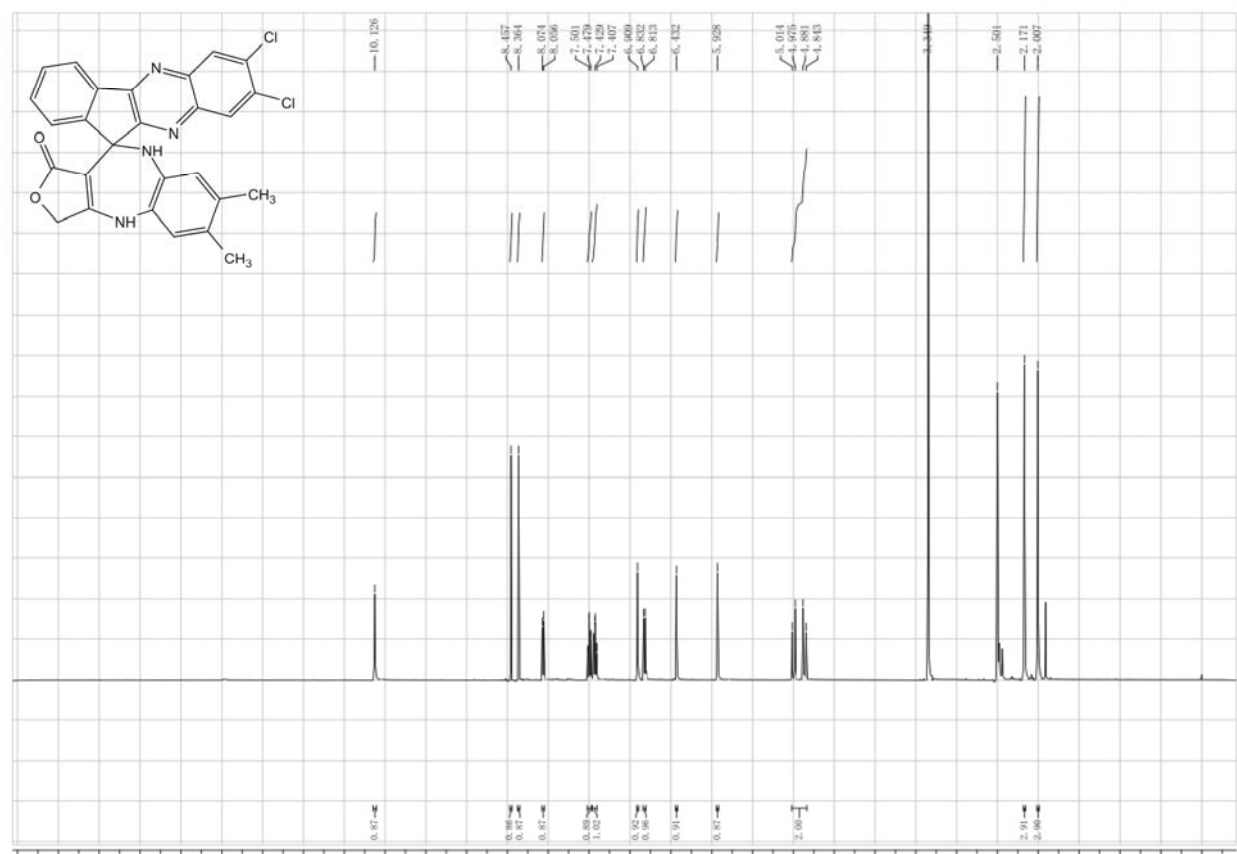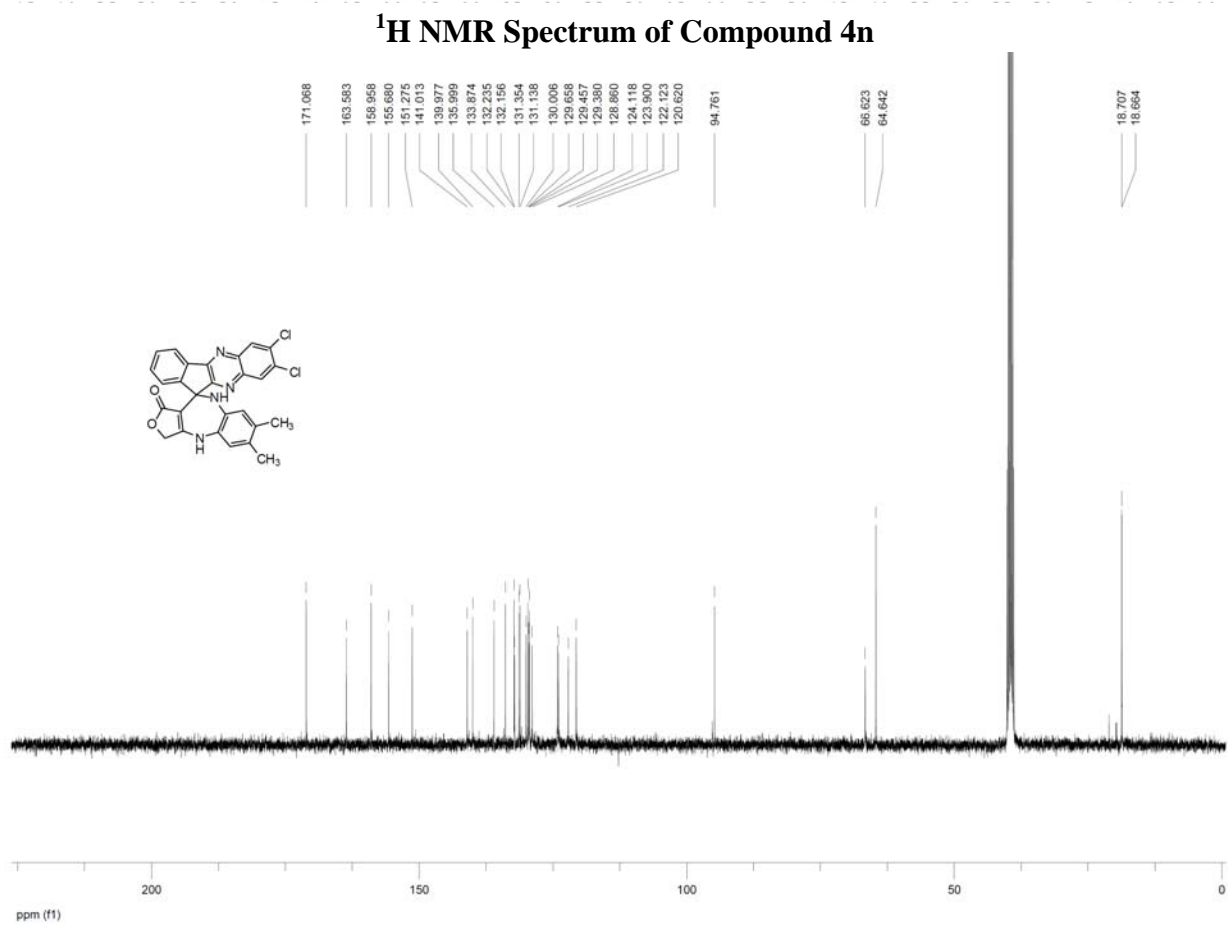

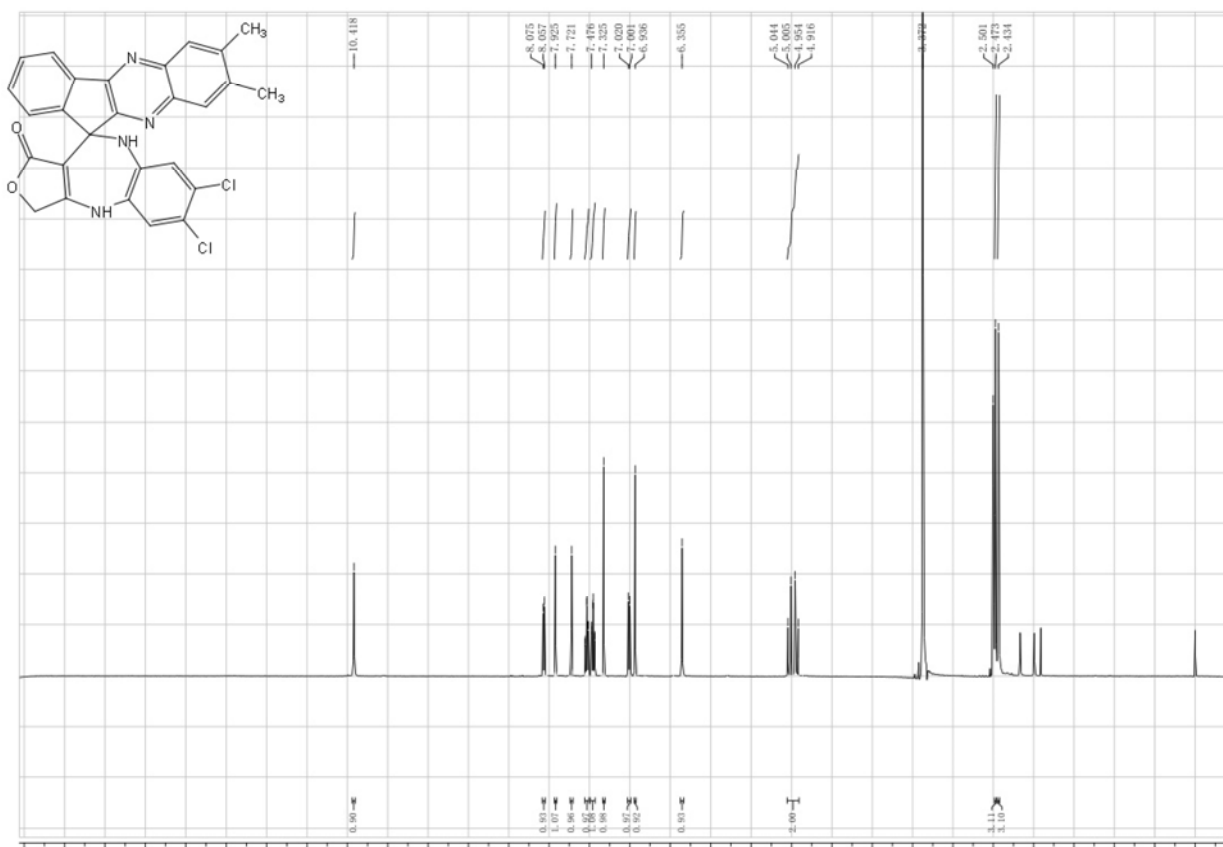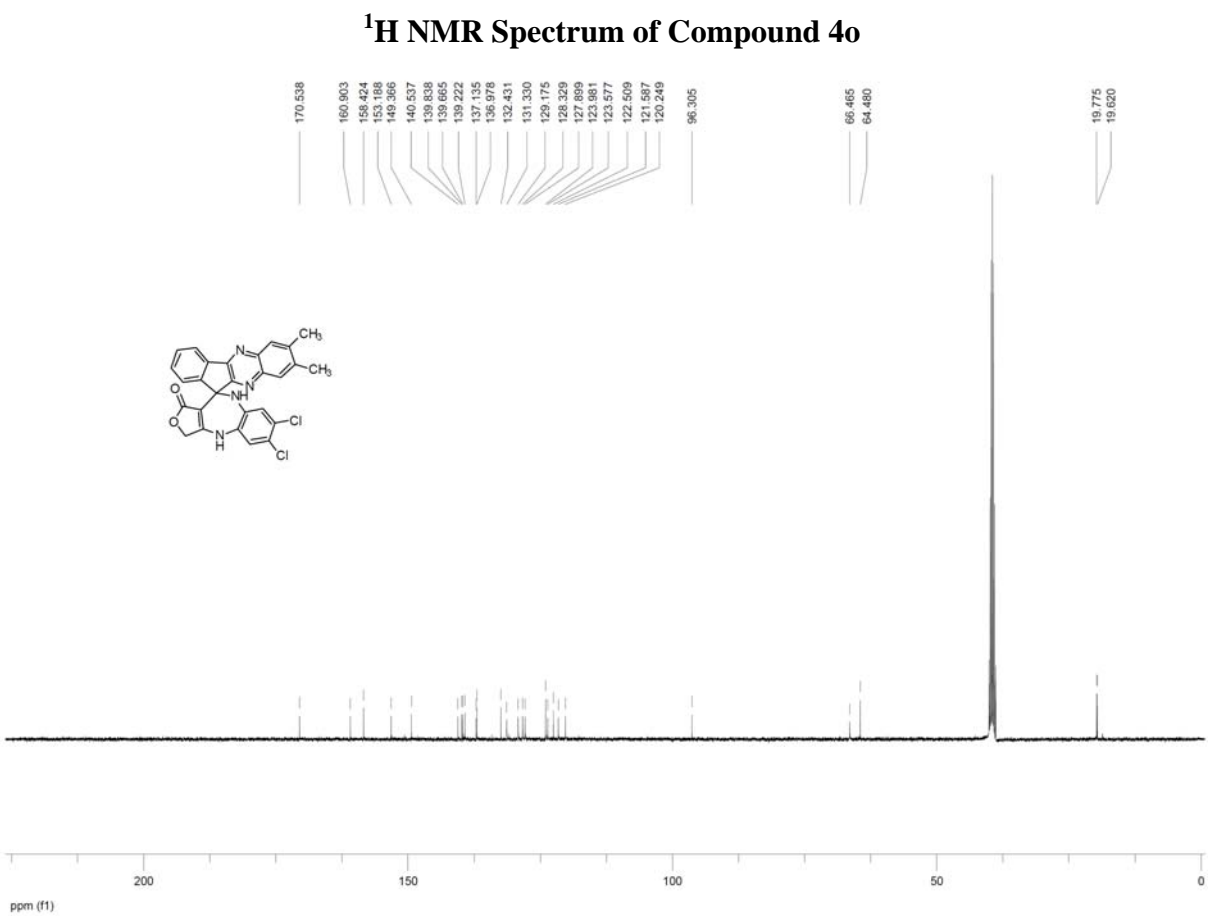

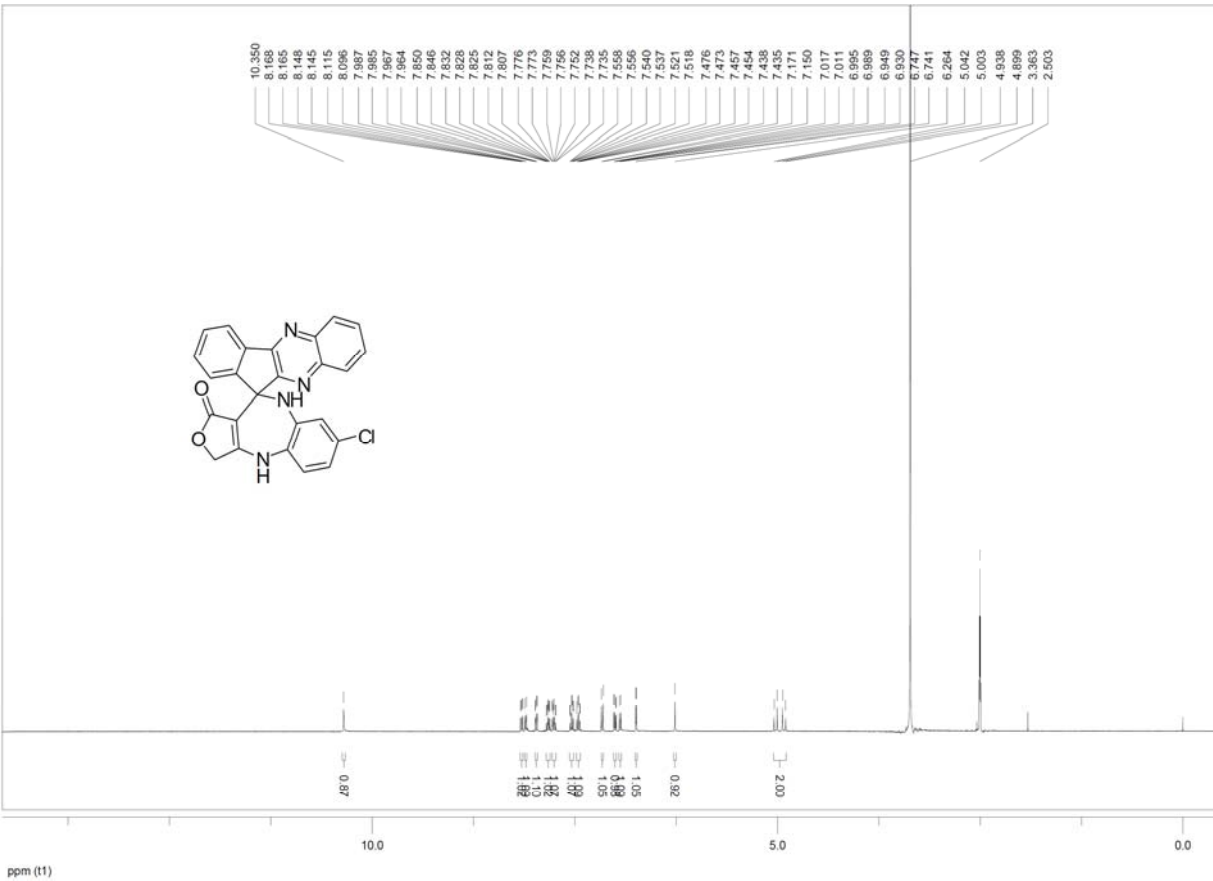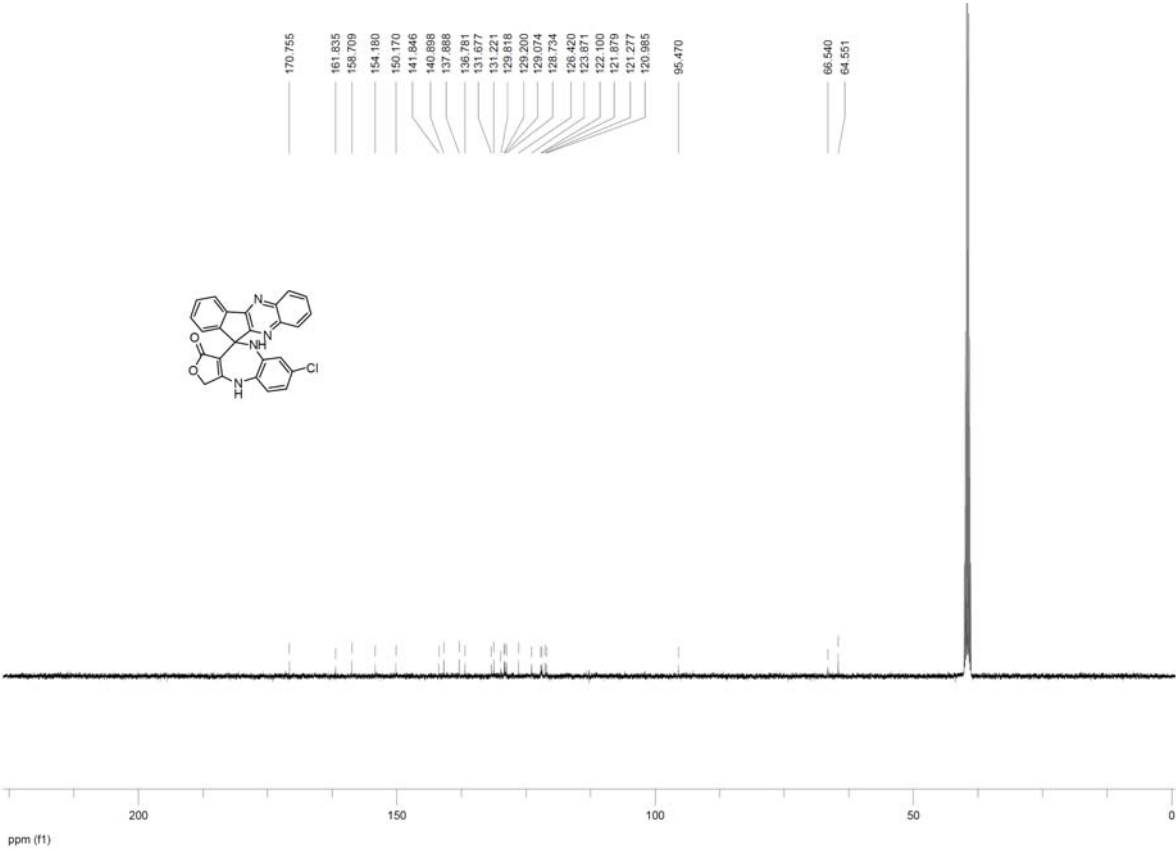

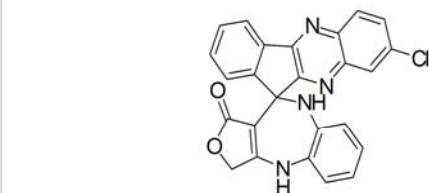

### <sup>1</sup>H NMR Spectrum of Compound 4q

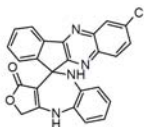

### <sup>13</sup>C NMR Spectrum of Compound 4g

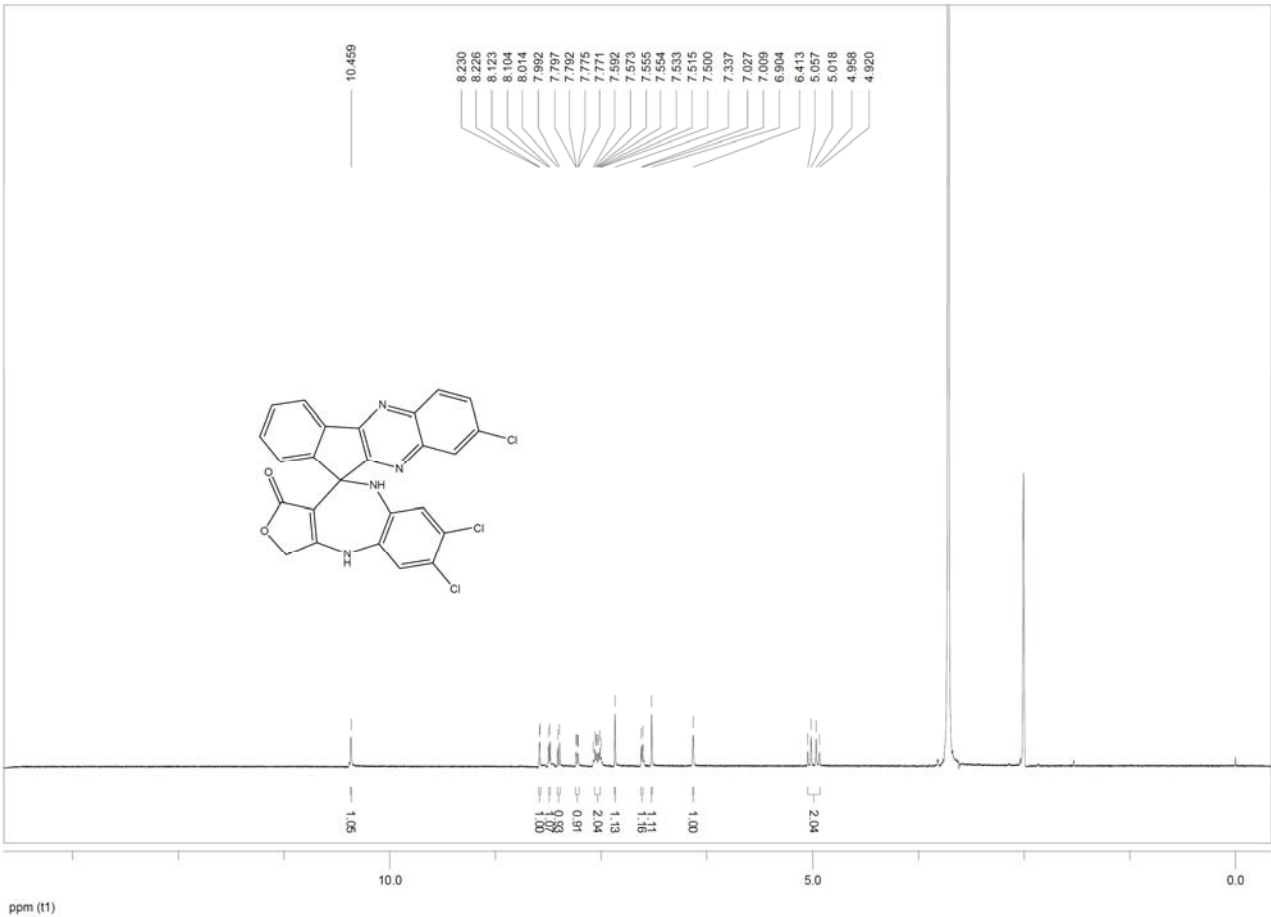

<sup>1</sup>H NMR Spectrum of Compound 4r

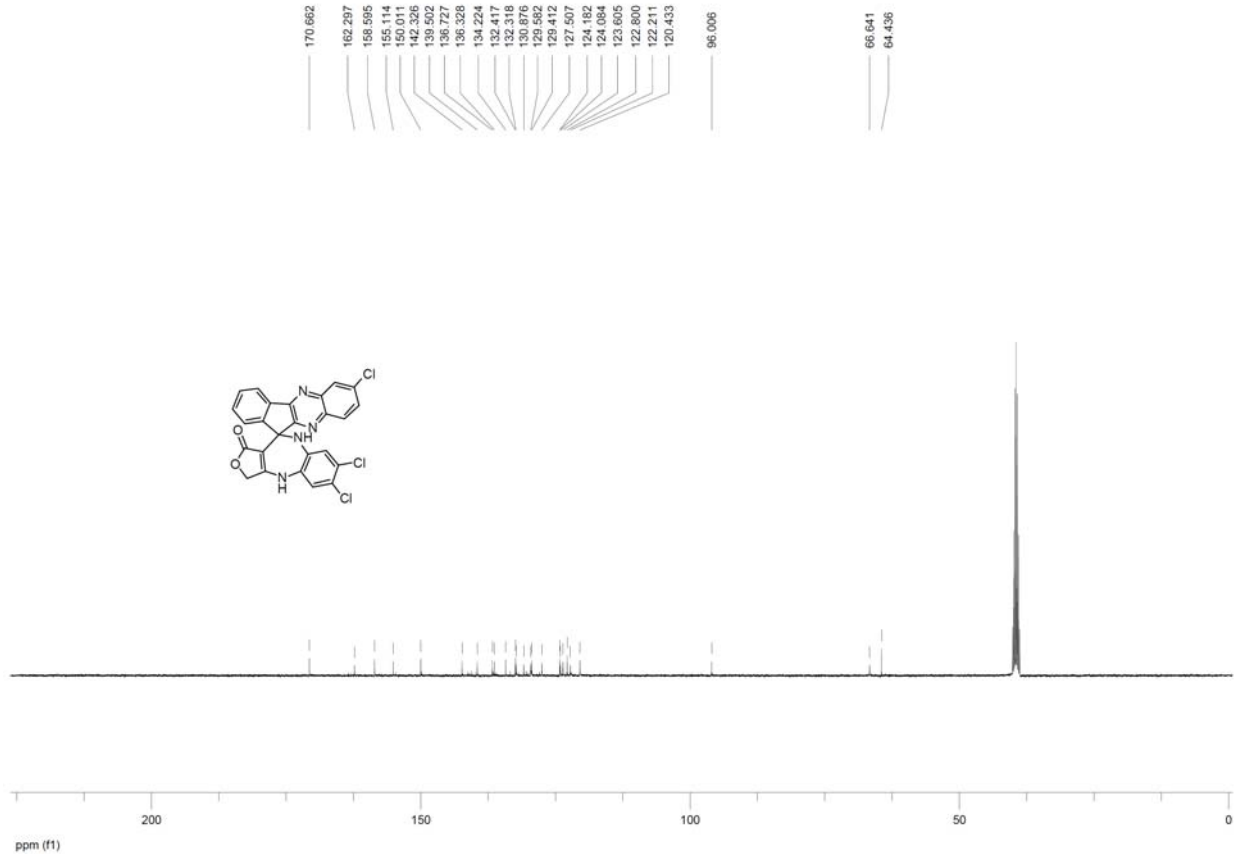

<sup>13</sup>C NMR Spectrum of Compound 4r



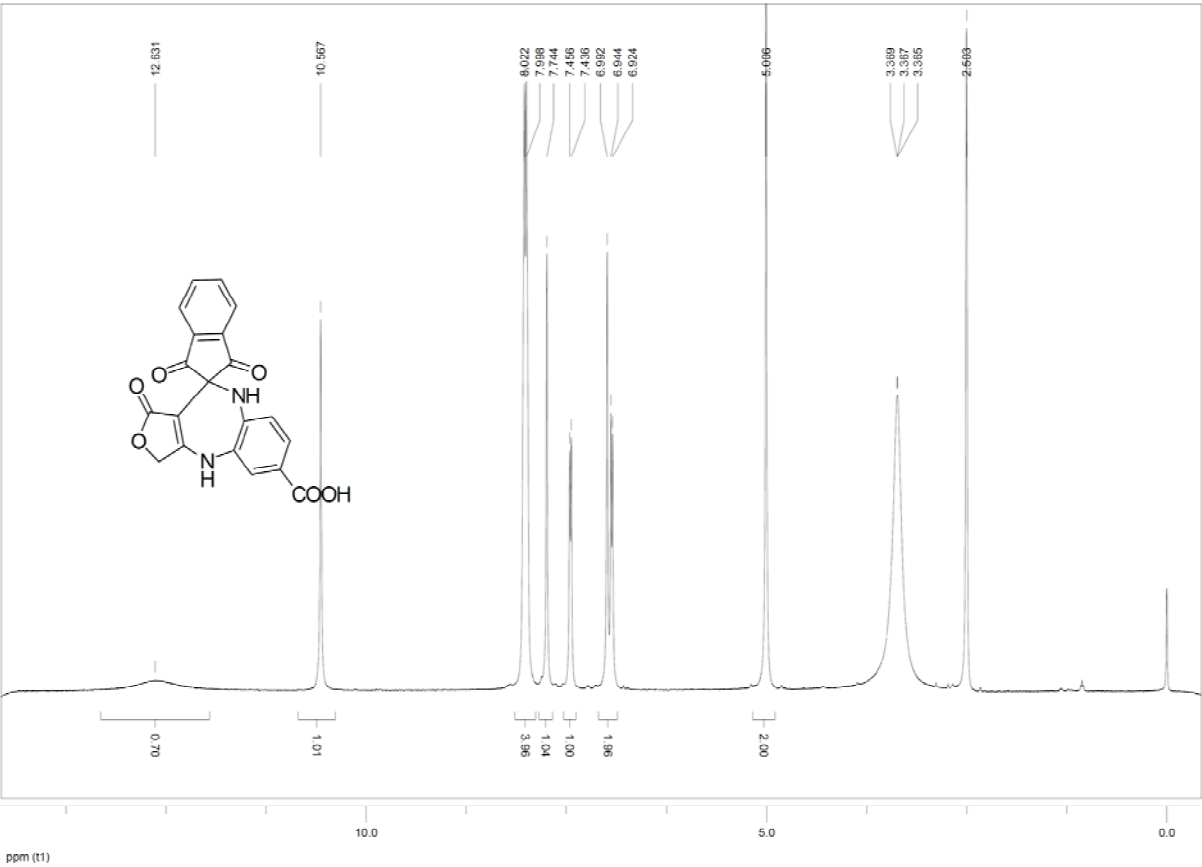

<sup>1</sup>H NMR Spectrum of Compound 5a

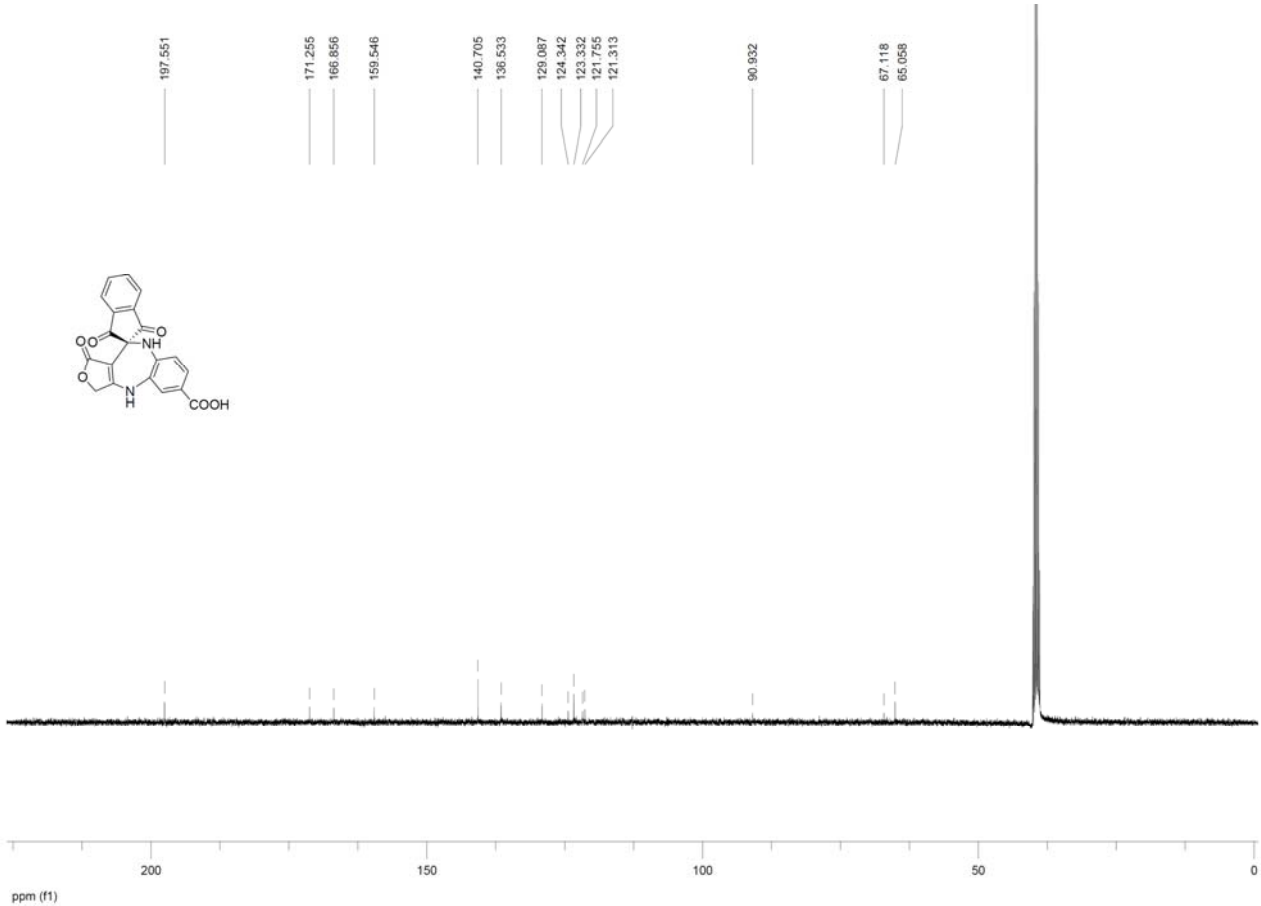

<sup>13</sup>C NMR Spectrum of Compound 5a

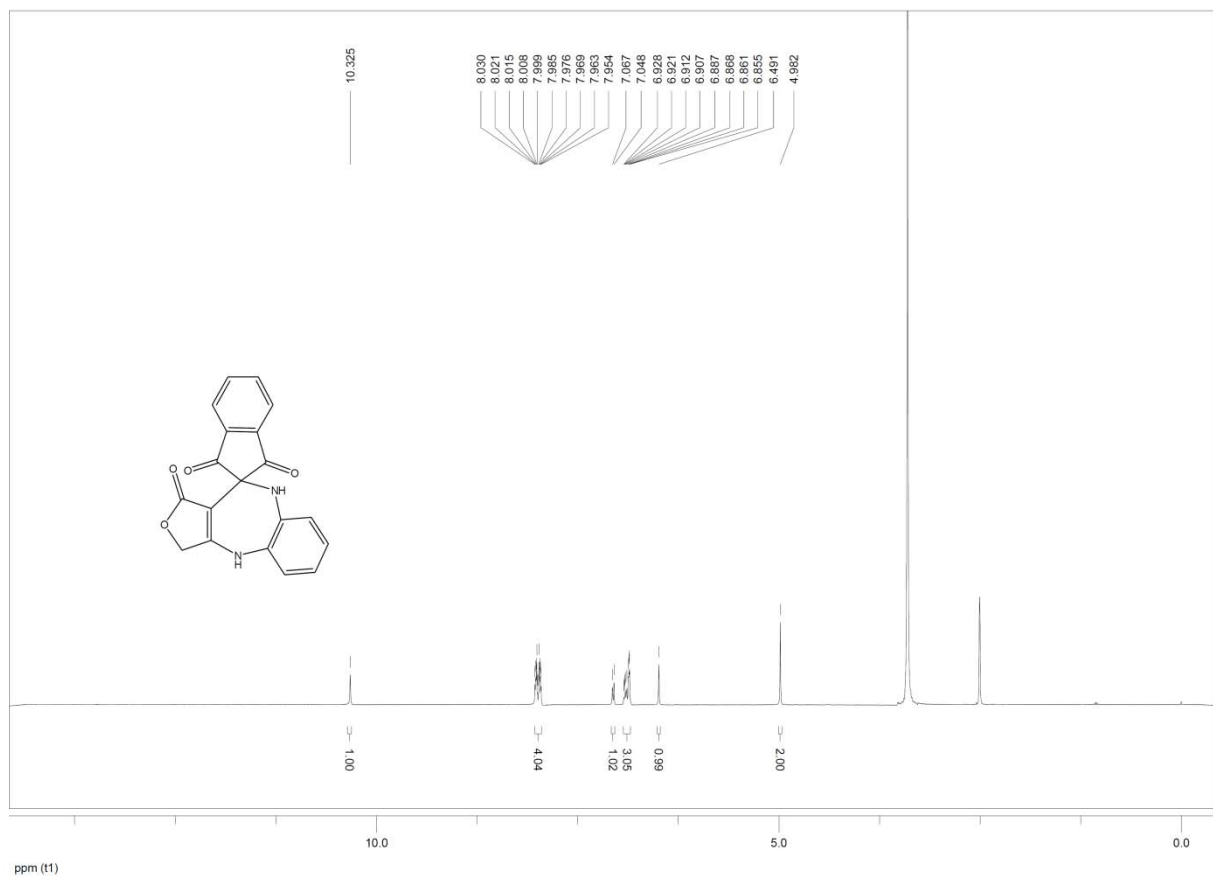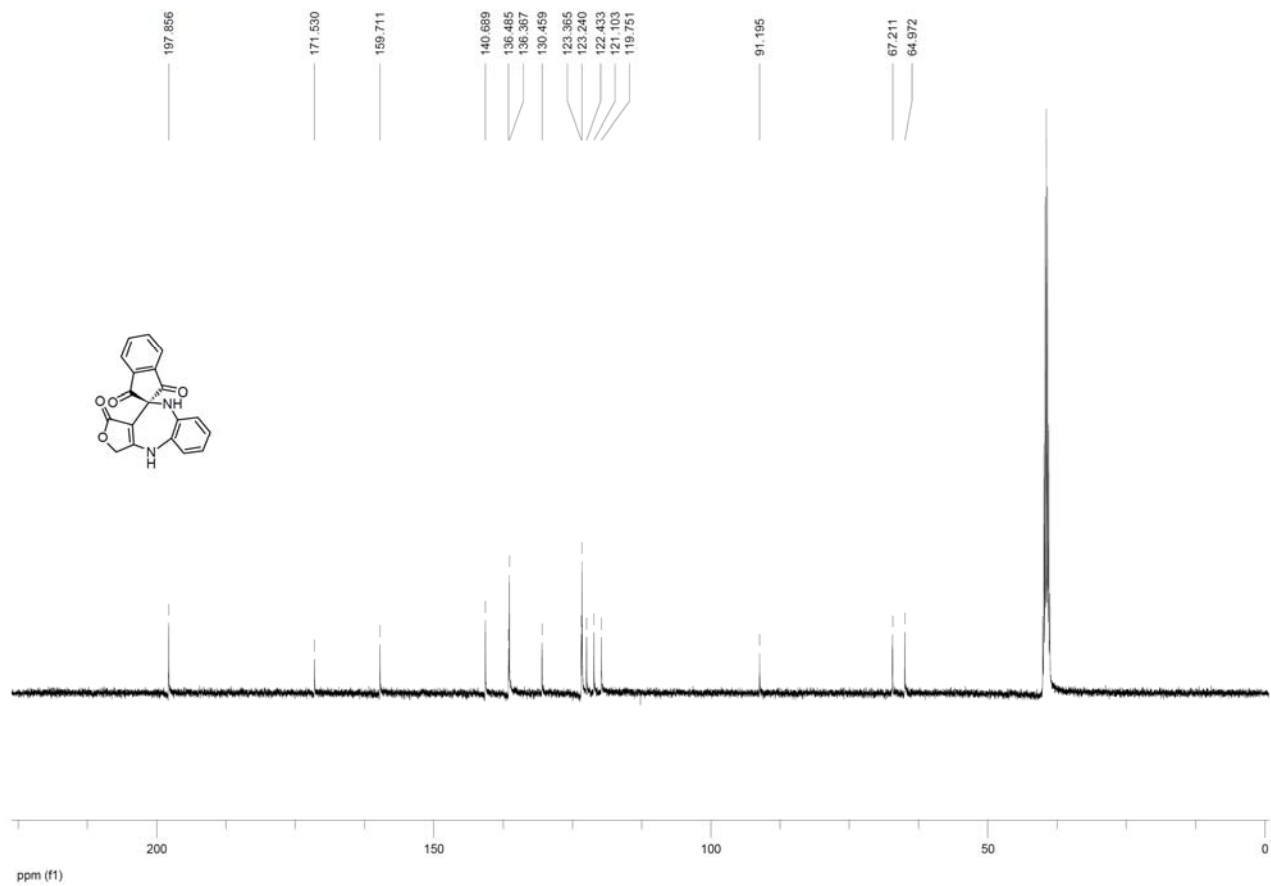

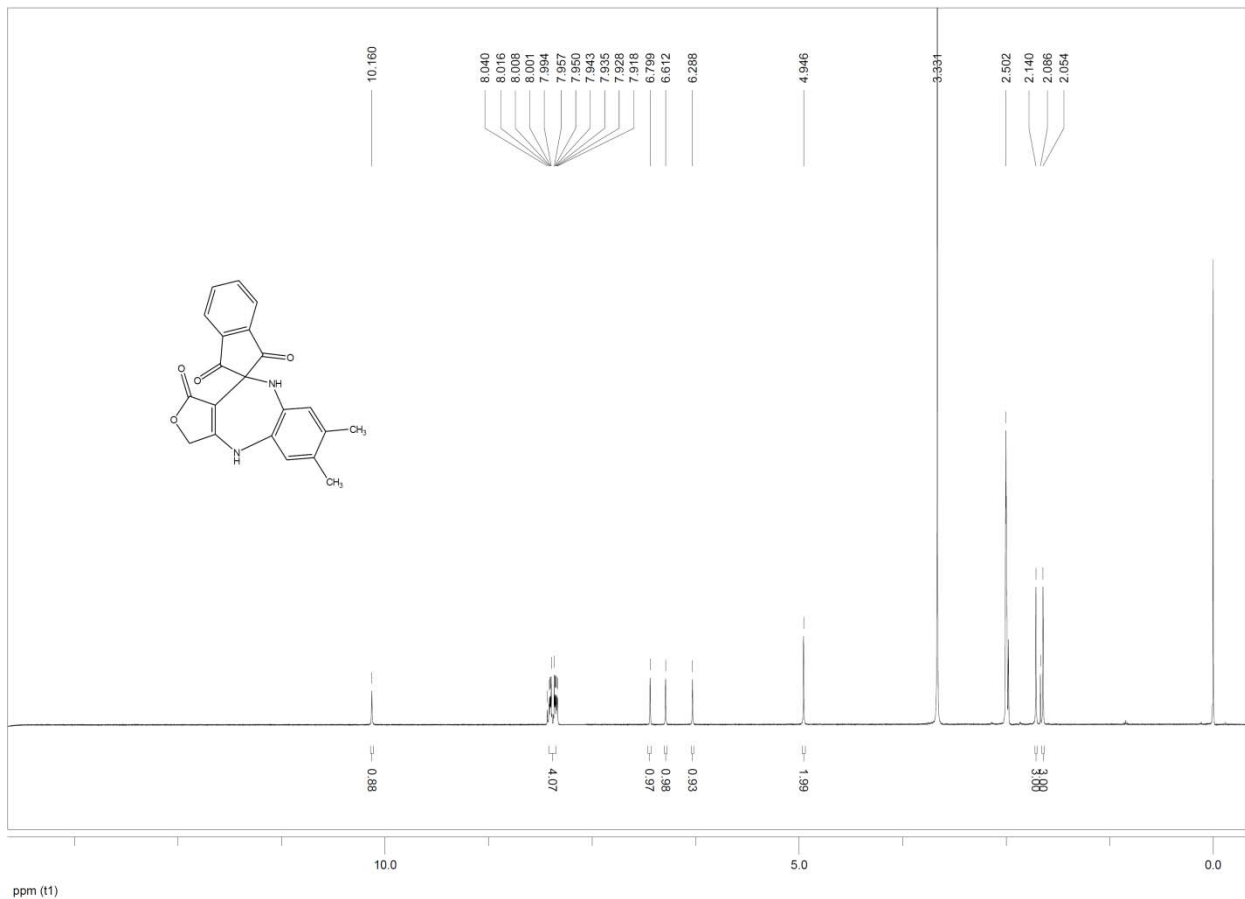

**<sup>1</sup>H NMR Spectrum of Compound 5c**

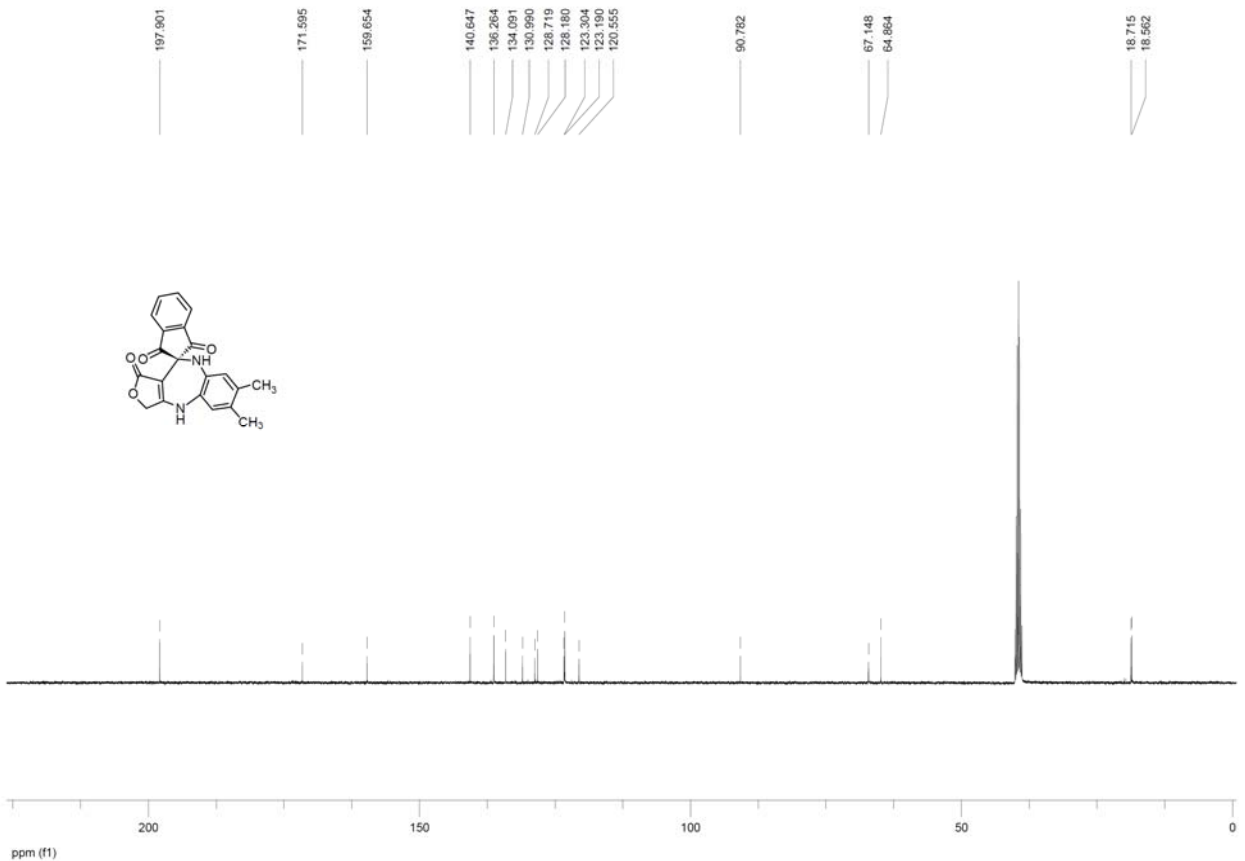

**<sup>13</sup>C NMR Spectrum of Compound 5c**

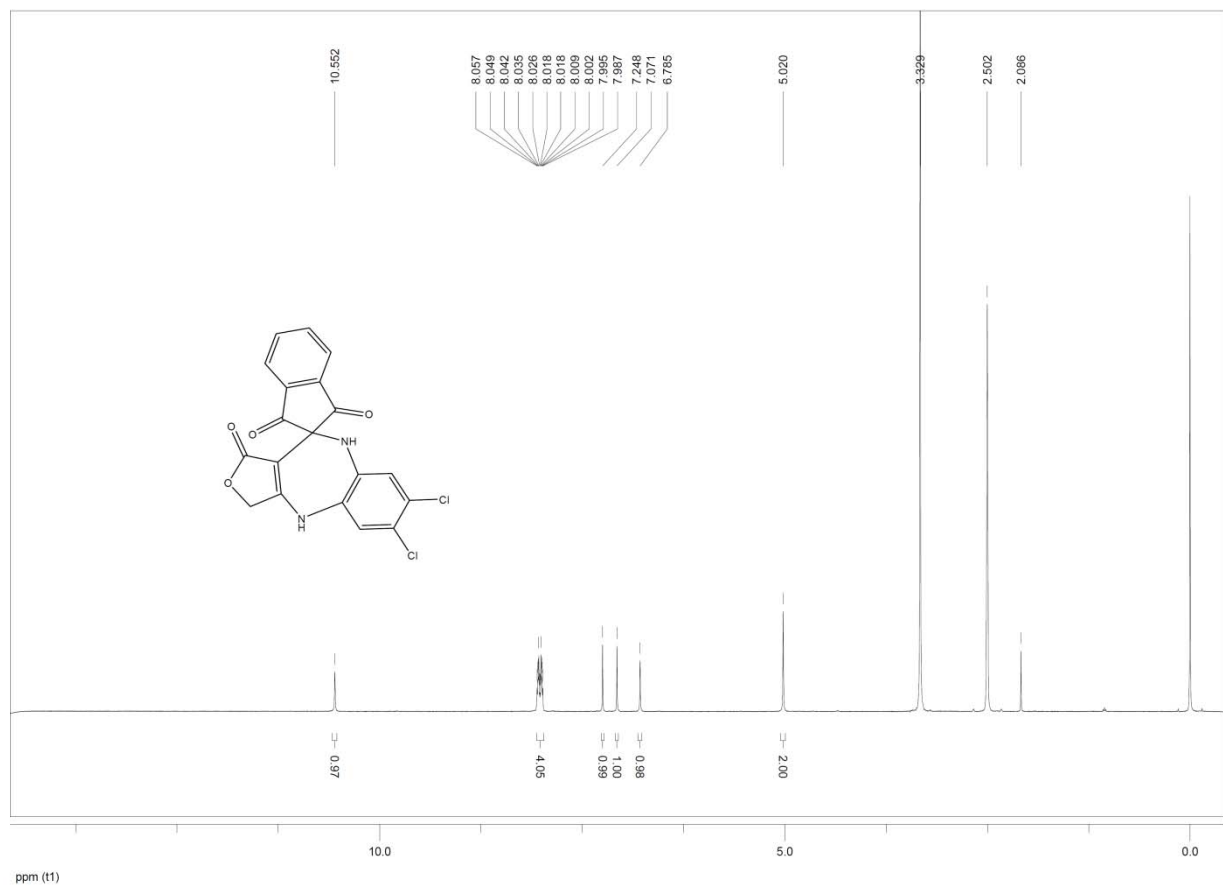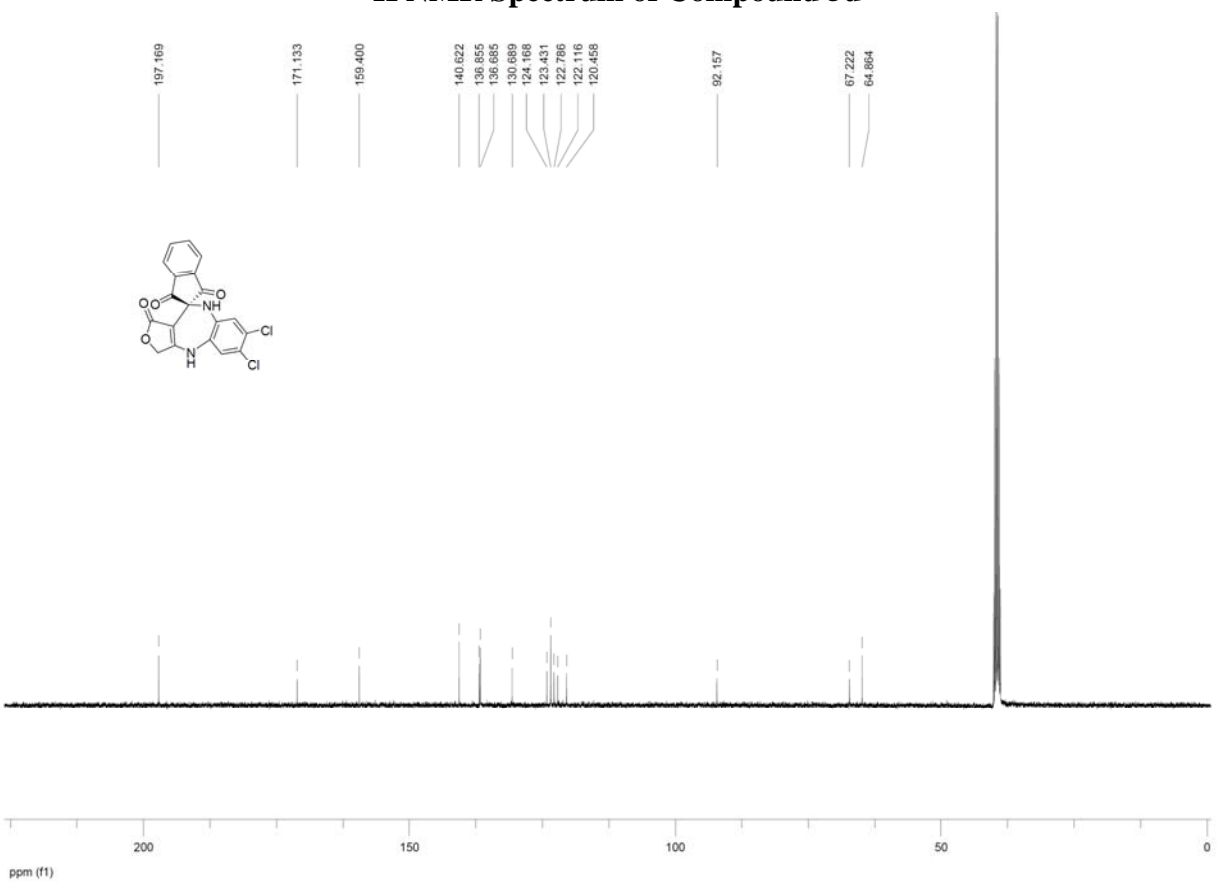

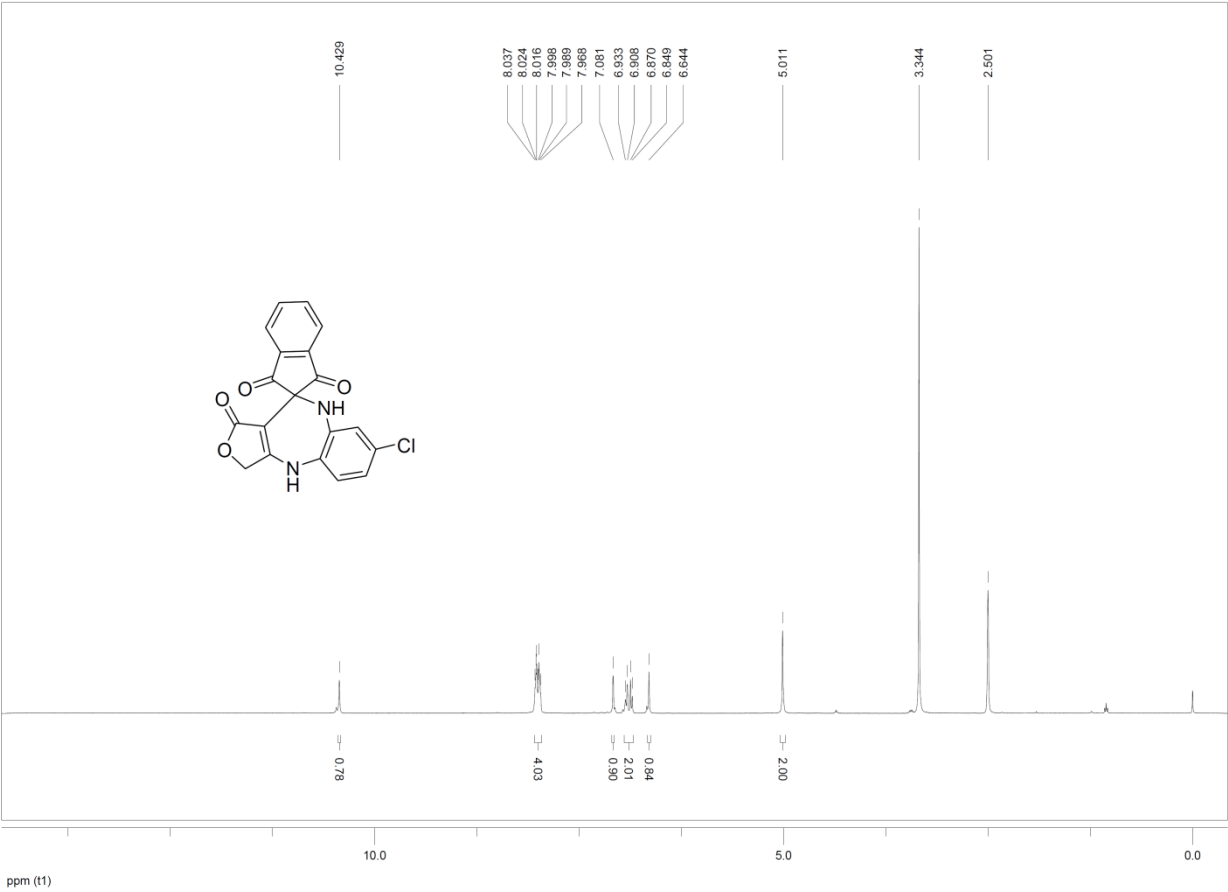

<sup>1</sup>H NMR Spectrum of Compound 5e

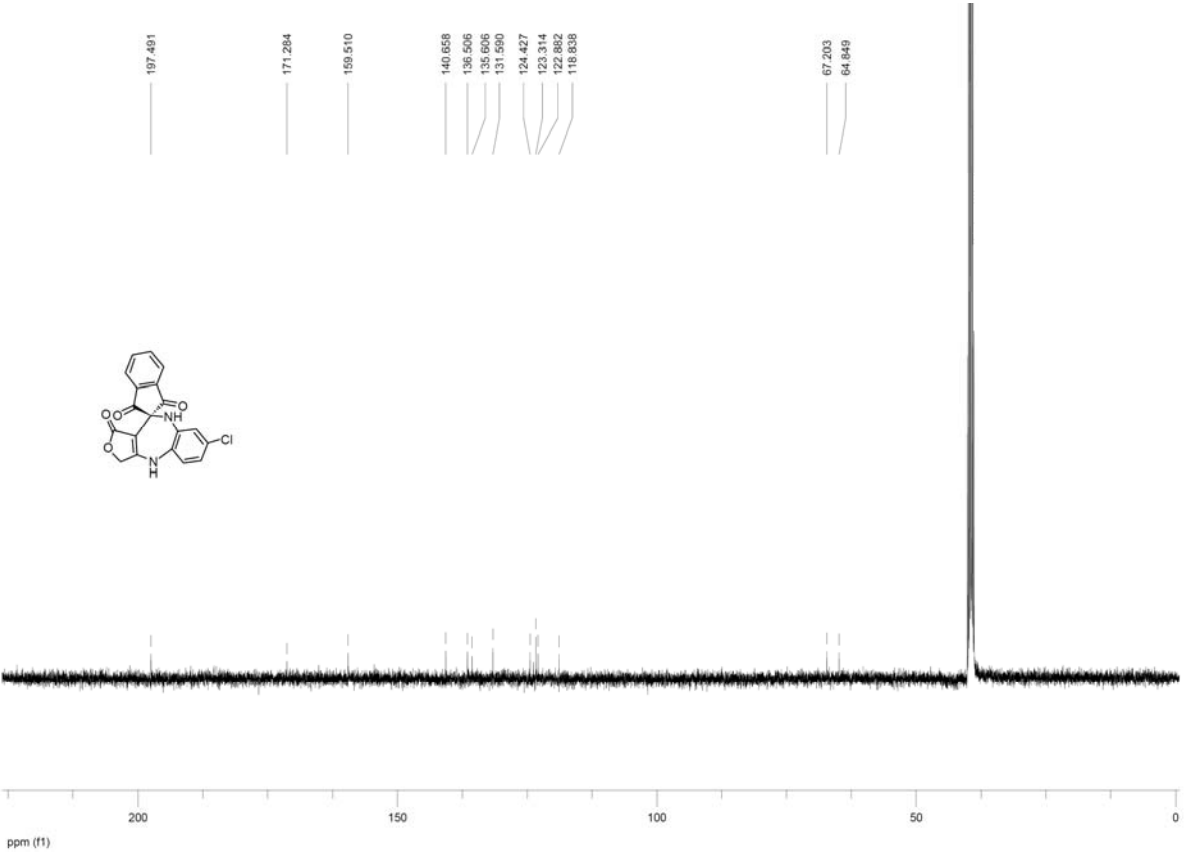

<sup>13</sup>C NMR Spectrum of Compound 5e
